# Supplementary material for: Heterovalent Glycodendrimers as Epitope Carriers for Antitumor Synthetic Vaccines
Source: PubMed Central journal article supplement — Chemistry. 2017 Oct 25;23(64):16283–96. doi: 10.1002/chem.201702708 (PMC6175327; doi:10.1002/chem.201702708), 2017-10-25
Supplement: CHEM-23-16283-s001.pdf [file CHEM-23-16283-s001.pdf]

# CHEMISTRY

## A **European** Journal

### Supporting Information

#### **Heterovalent Glycodendrimers as Epitope Carriers for Antitumor Synthetic Vaccines**

Carlo Pifferi,<sup>[a]</sup> Baptiste Thomas,<sup>[a]</sup> David Goyard,<sup>[a]</sup> Nathalie Berthet,<sup>[a]</sup> and Olivier Renaudet\*<sup>[a, b]</sup>

chem\_201702708\_sm\_miscellaneous\_information.pdf

## Table of contents

|                                                                                                   |     |
|---------------------------------------------------------------------------------------------------|-----|
| <b>Compound 1.</b> RP-UPLC crude profile, ESI <sup>+</sup> -MS, <sup>1</sup> H-NMR, RP-HPLC. .... | S1  |
| <b>Compound 2.</b> RP-UPLC crude profile, ESI <sup>+</sup> -MS, <sup>1</sup> H-NMR, RP-HPLC. .... | S4  |
| <b>Compound 3.</b> ESI <sup>+</sup> -MS, RP-HPLC. ....                                            | S7  |
| <b>Compound 4.</b> HRMS (ESI <sup>+</sup> -TOF), RP-HPLC. ....                                    | S8  |
| <b>Compound 5.</b> HRMS (ESI <sup>+</sup> -TOF), RP-HPLC. ....                                    | S9  |
| <b>Compound 6.</b> HRMS (ESI <sup>+</sup> -TOF), RP-HPLC. ....                                    | S10 |
| <b>Compound 7.</b> HRMS (ESI <sup>+</sup> -TOF), RP-HPLC. ....                                    | S11 |
| <b>Compound 9.</b> <sup>1</sup> H-NMR. ....                                                       | S12 |
| <b>Compound 13.</b> <sup>1</sup> H-NMR, <sup>13</sup> C-NMR. ....                                 | S13 |
| <b>Compound 15.</b> <sup>1</sup> H-NMR, <sup>13</sup> C-NMR. ....                                 | S14 |
| <b>Compound 16.</b> HRMS (ESI <sup>+</sup> -TOF), RP-HPLC. ....                                   | S15 |
| <b>Compound 17.</b> HRMS (ESI <sup>+</sup> -TOF), RP-HPLC. ....                                   | S16 |
| <b>Compound 18.</b> HRMS (ESI <sup>+</sup> -TOF), RP-HPLC. ....                                   | S17 |
| <b>Compound 19.</b> HRMS (ESI <sup>+</sup> -TOF), RP-HPLC. ....                                   | S18 |
| <b>Compound 20.</b> HRMS (ESI <sup>+</sup> -TOF), RP-HPLC. ....                                   | S19 |
| <b>Compound 21.</b> HRMS (ESI <sup>+</sup> -TOF), RP-HPLC. ....                                   | S20 |
| <b>Compound 22.</b> HRMS (ESI <sup>+</sup> -TOF), RP-HPLC. ....                                   | S21 |
| <b>Compound 23.</b> HRMS (ESI <sup>+</sup> -TOF), RP-HPLC. ....                                   | S22 |
| <b>Compound 24.</b> ESI <sup>+</sup> -MS, RP-HPLC. ....                                           | S23 |
| <b>Compound 25.</b> ESI <sup>+</sup> -MS, RP-HPLC. ....                                           | S24 |
| <b>Compound 26.</b> ESI <sup>+</sup> -MS, RP-HPLC. ....                                           | S25 |
| <b>Compound 27.</b> ESI <sup>+</sup> -MS, RP-HPLC. ....                                           | S26 |
| <b>Compound 28.</b> ESI <sup>+</sup> -MS, RP-HPLC. ....                                           | S27 |
| <b>Compound 29.</b> ESI <sup>+</sup> -MS, RP-HPLC. ....                                           | S28 |
| <b>Compound 30.</b> Synthesis, ESI <sup>+</sup> -MS, <sup>1</sup> H-NMR, RP-HPLC. ....            | S29 |
| <b>Compound 31.</b> Synthesis, HRMS (ESI <sup>+</sup> -TOF), <sup>1</sup> H-NMR, RP-HPLC. ....    | S32 |
| <b>Compound 32.</b> Synthesis, HRMS (ESI <sup>+</sup> -TOF), <sup>1</sup> H-NMR, RP-HPLC. ....    | S35 |
| <b>Compound 33.</b> Synthesis, HRMS (ESI <sup>+</sup> -TOF), <sup>1</sup> H-NMR, RP-HPLC. ....    | S37 |
| <b>References</b> .....                                                                           | S39 |

# Compound 1

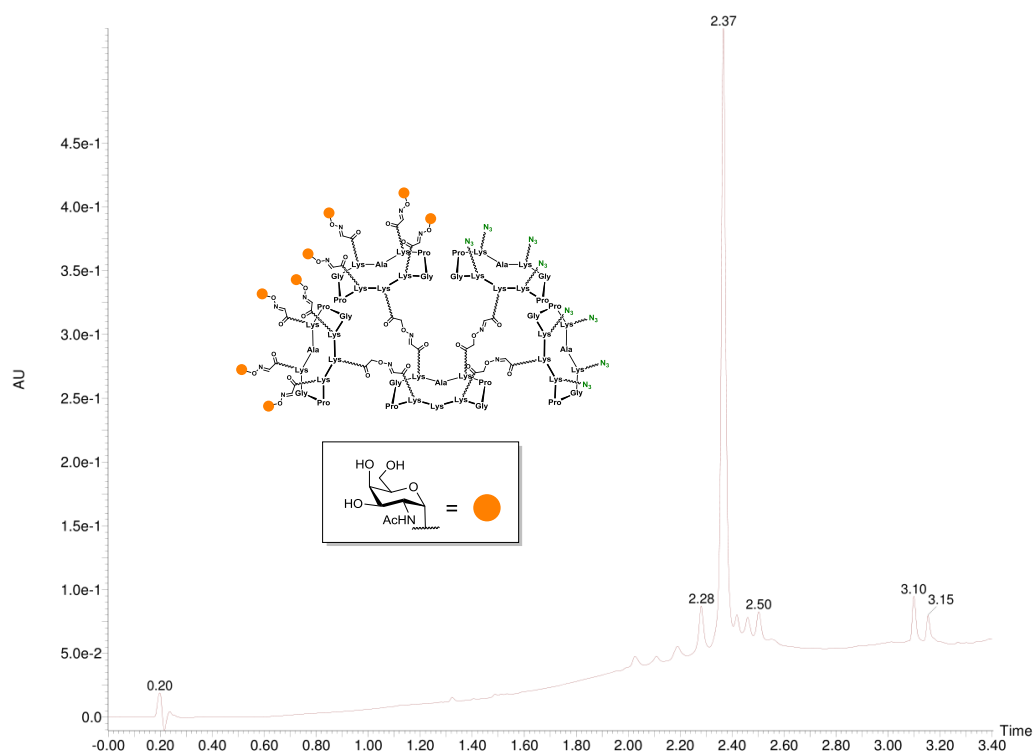

**Figure S1.** RP-UPLC crude profile of oxime ligation between **27** and **8** at  $t=30$  min. Octa-Tn intermediate:  $t_R=2.37$  min. (5-60% solv.D in 3.0 min.).

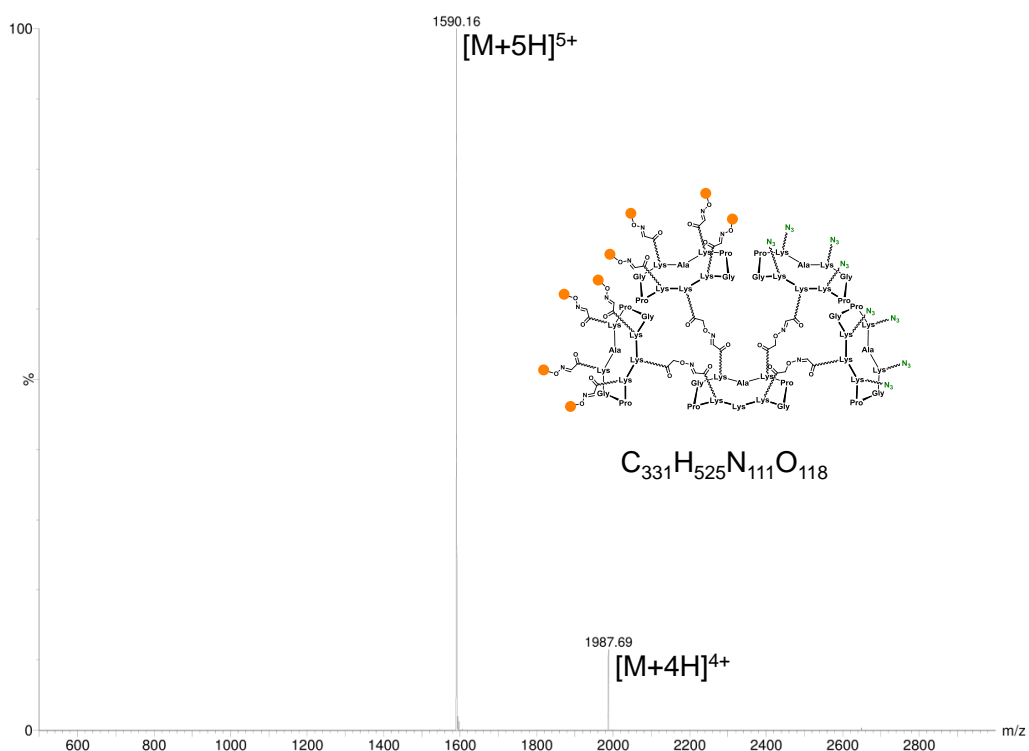

**Figure S2.** ESI<sup>+</sup>-MS spectrum of Octa-Tn intermediate resulting from oxime ligation between **27** and **8**.  $m/z$  (Average Mwt) calcd. for  $C_{331}H_{530}N_{111}O_{118}$   $[M+5H]^{5+}$ : 1590.5, found: 1590.2; calcd. for  $C_{331}H_{529}N_{111}O_{118}$   $[M+4H]^{4+}$ : 1987.9, found: 1987.7

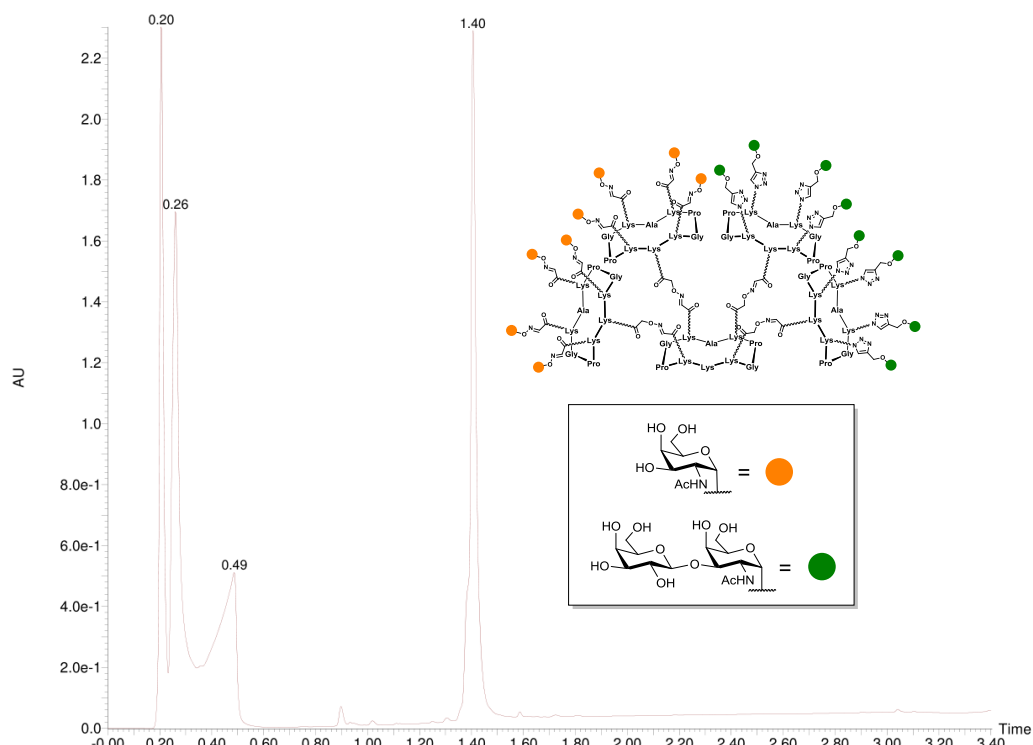

**Figure S3.** RP-UPLC crude profile of CuAAC ligation at  $t=90$  min. Compound **1**:  $t_R=1.40$  min. (5-60% solv.D in 3.0 min.).

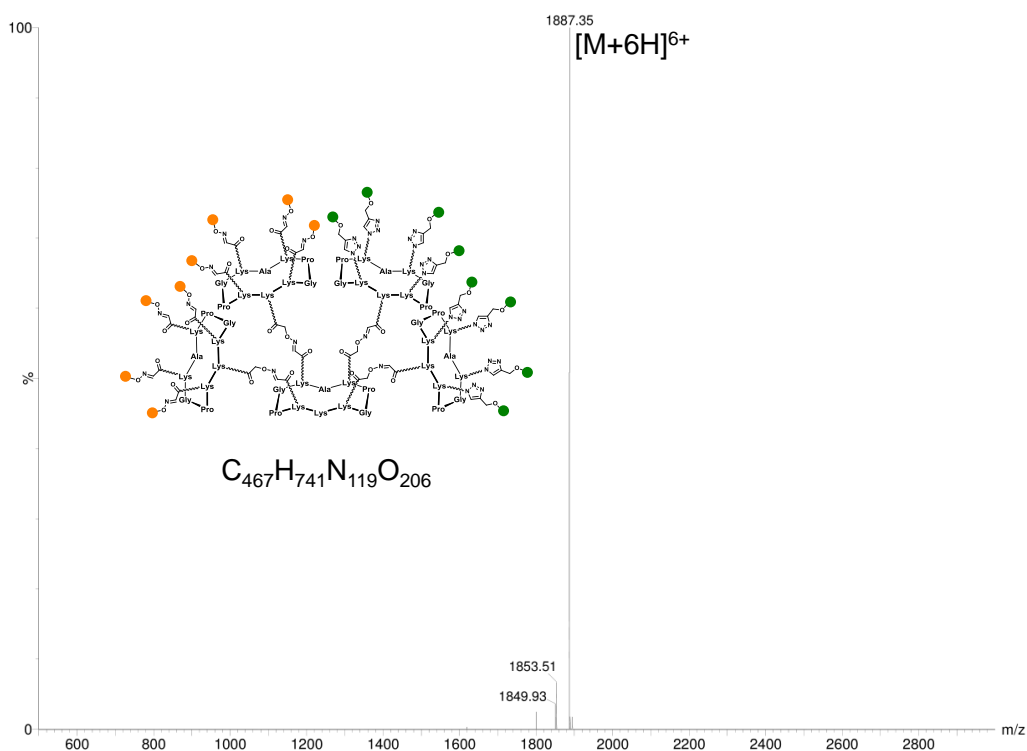

**Figure S4.** ESI<sup>+</sup>-MS spectrum of **1**.  $m/z$  (Average Mwt) calcd. for  $C_{467}H_{747}N_{119}O_{206}$   $[M+6H]^{6+}$ : 1887.4, found: 1887.4

$^1\text{H-NMR}$  of **1** in  $\text{D}_2\text{O}$  at 400 MHz

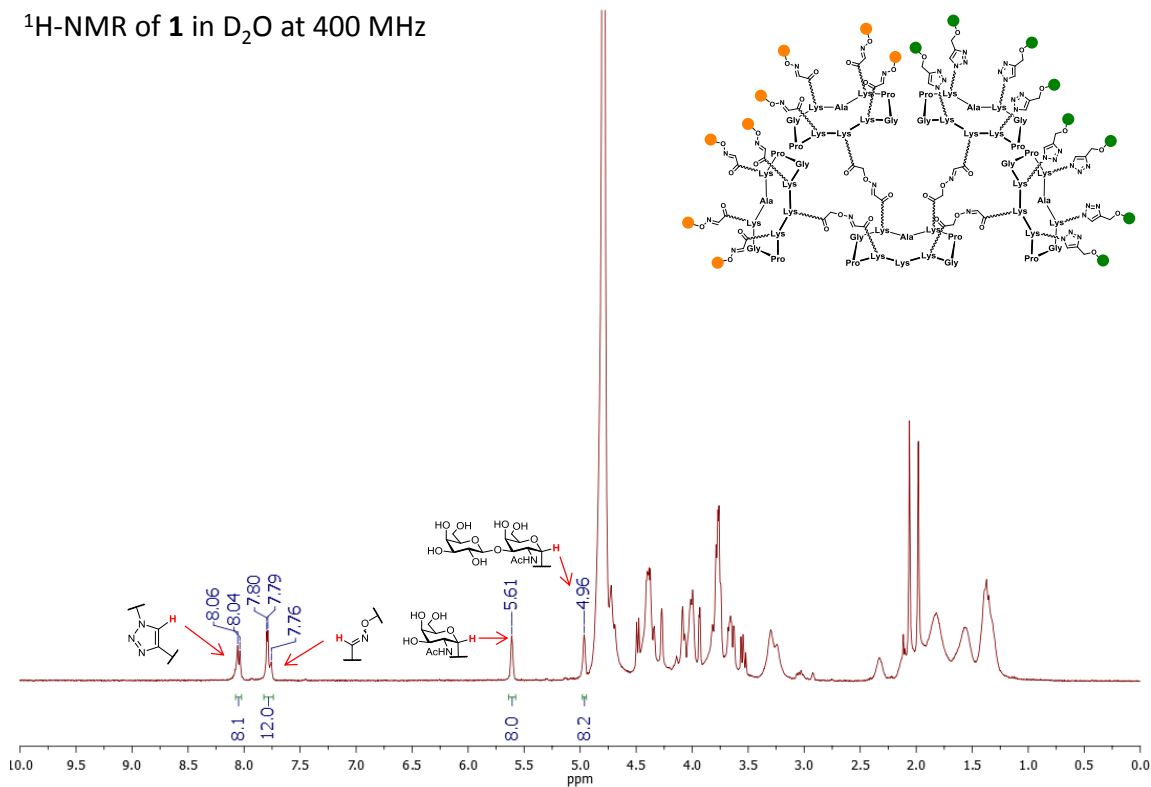

**Figure S5.**  $^1\text{H-NMR}$  spectrum of compound **1** ( $\text{D}_2\text{O}$ , 400 MHz) showing integration of characteristic signals.

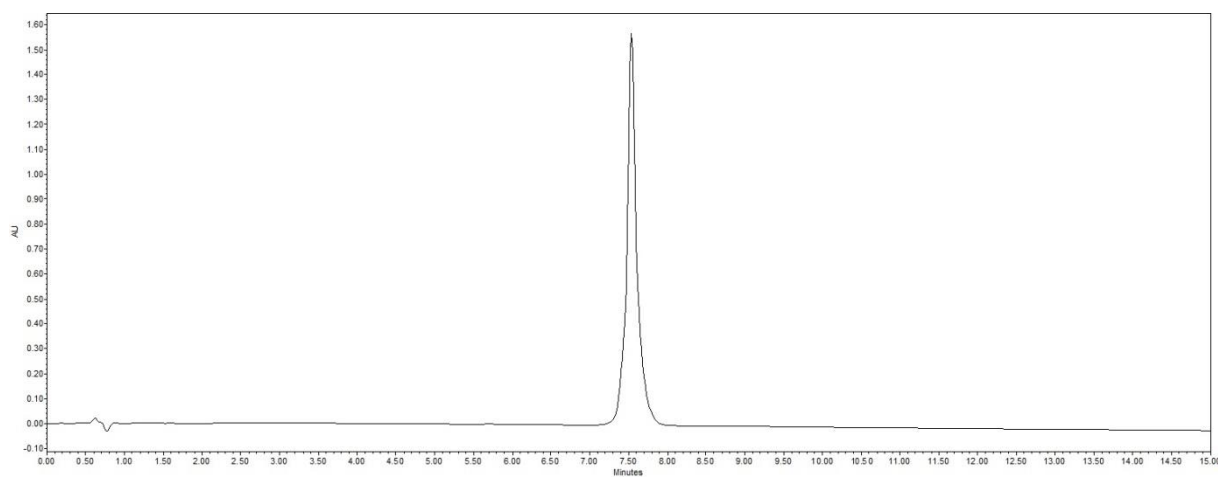

**Figure S6.** RP-HPLC profile of **1**:  $t_R = 7.54$  min. (0-40% solv.B in 15 min.).

## Compound 2

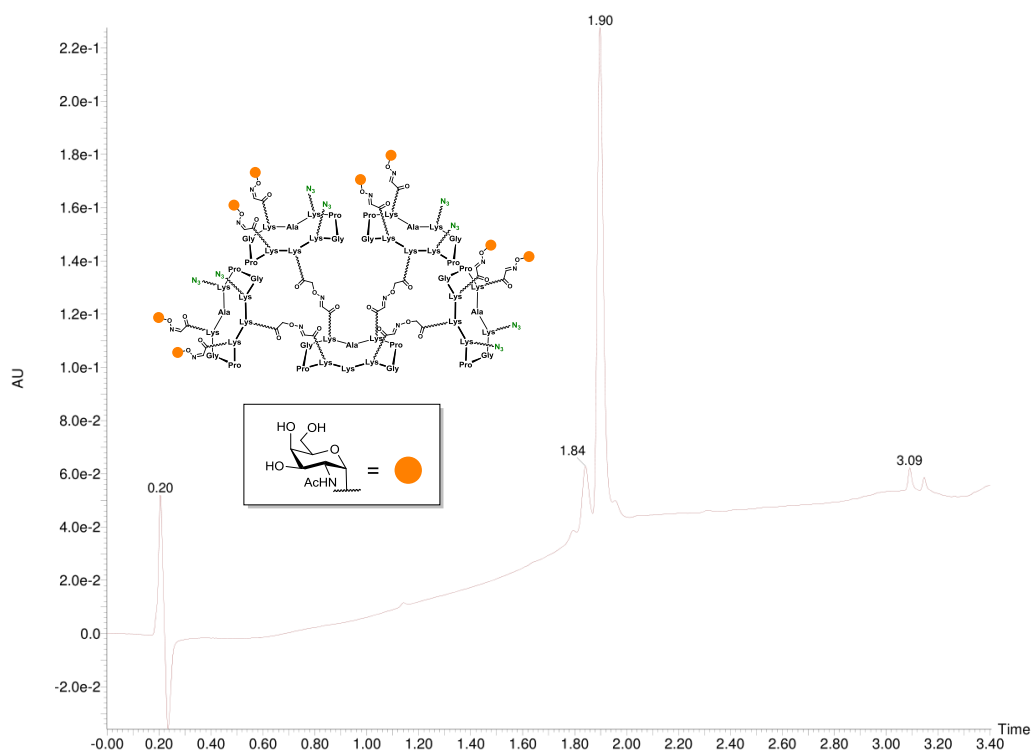

**Figure S7.** RP-UPLC crude profile of oxime ligation between **29** and **8** at  $t=30$  min. Octa-Tn intermediate:  $t_R=1.90$  min. (5-60% solv.D in 3.0 min.).

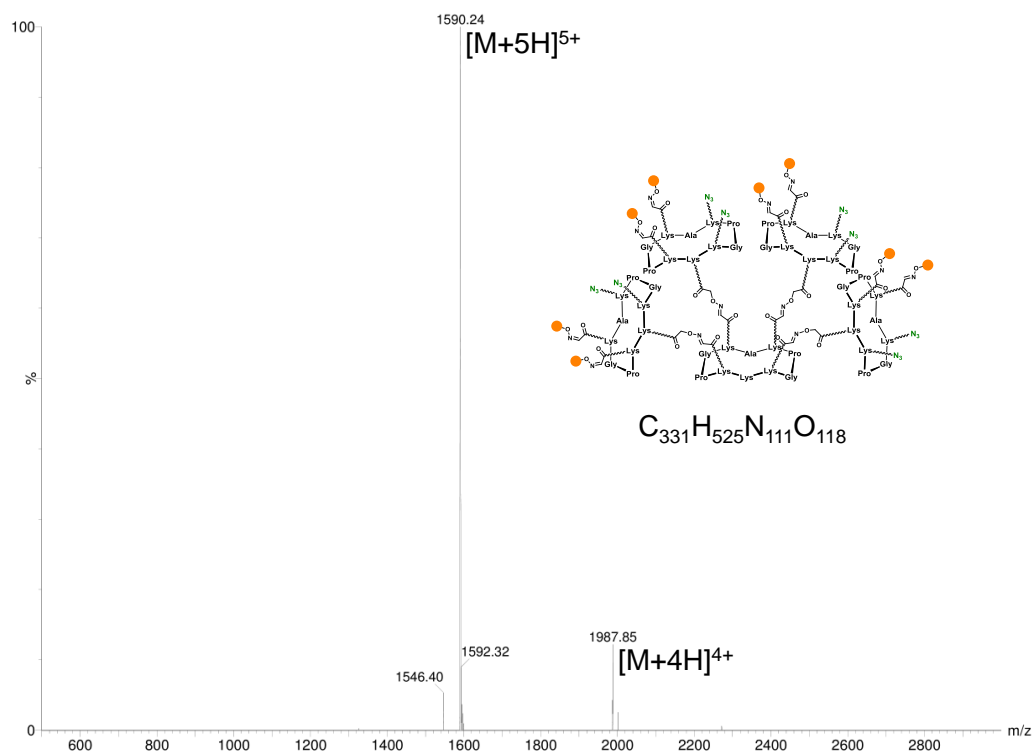

**Figure S8.** ESI<sup>+</sup>-MS spectrum of Octa-Tn intermediate resulting from oxime ligation between **29** and **8**.  $m/z$  (Average Mwt) calcd. for  $C_{331}H_{530}N_{111}O_{118}$   $[M+5H]^{5+}$ : 1590.5, found: 1590.2; calcd. for  $C_{331}H_{529}N_{111}O_{118}$   $[M+4H]^{4+}$ : 1987.9, found: 1987.9

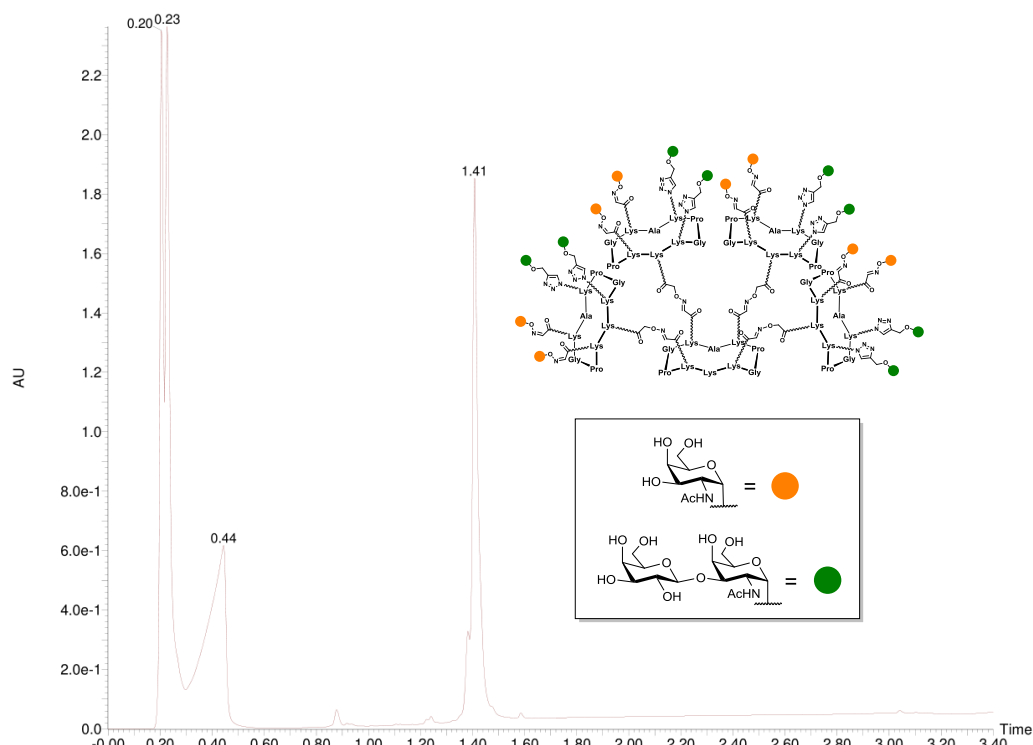

**Figure S9.** RP-UPLC crude profile of CuAAC ligation at  $t=90$  min. Compound **2**:  $t_R=1.41$  min. (5-60% solv.D in 3.0 min.).

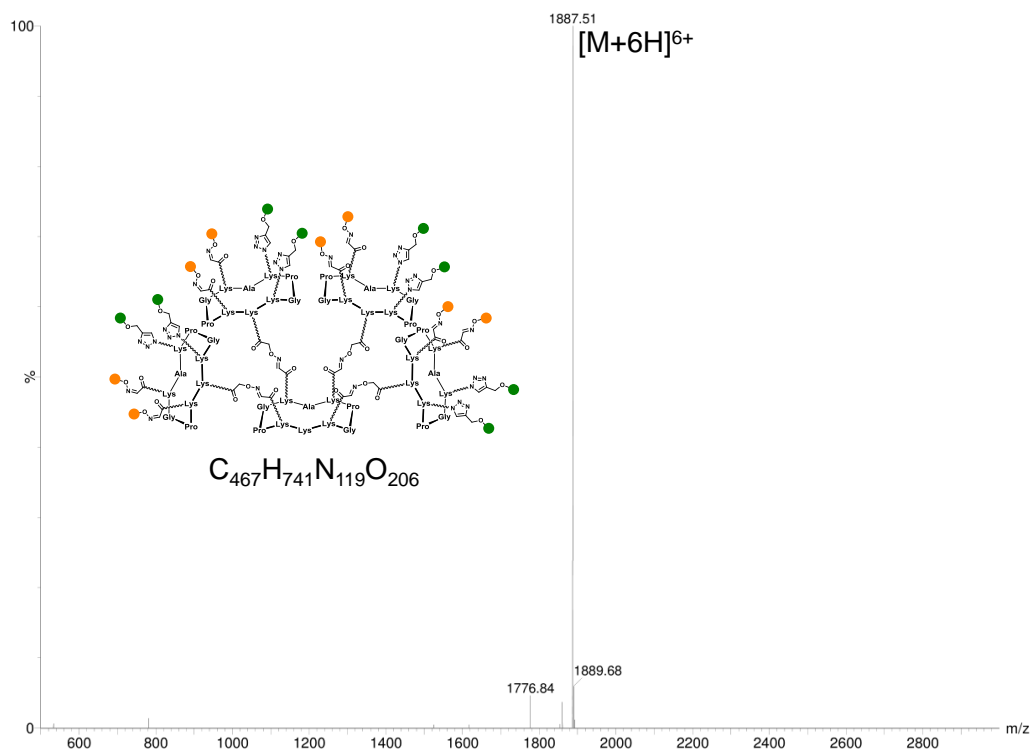

**Figure S10.** ESI<sup>+</sup>-MS spectrum of **2**.  $m/z$  (Average Mwt) calcd. for  $C_{467}H_{741}N_{119}O_{206}$   $[M+6H]^{6+}$ : 1887.4, found: 1887.5

$^1\text{H-NMR}$  of **2** in  $\text{D}_2\text{O}$  at 400 MHz

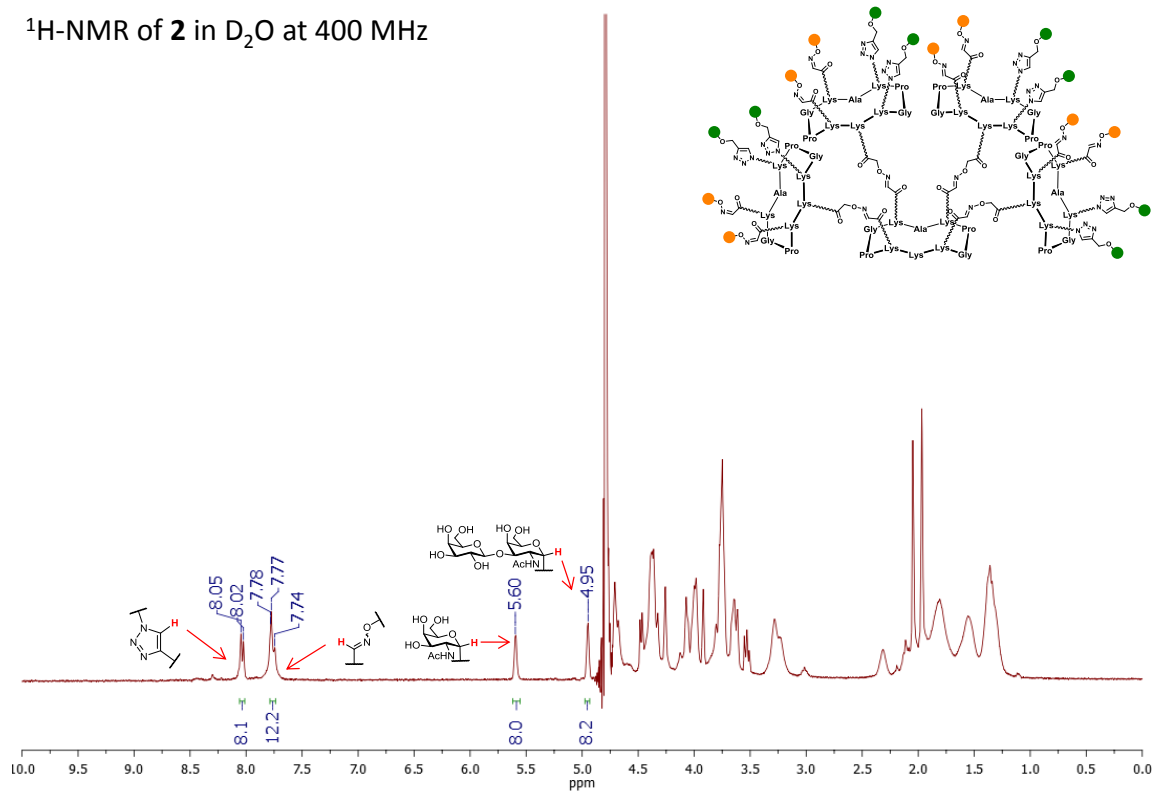

**Figure S11.**  $^1\text{H-NMR}$  spectrum of compound **2** ( $\text{D}_2\text{O}$ , 400 MHz) showing integration of characteristic signals.

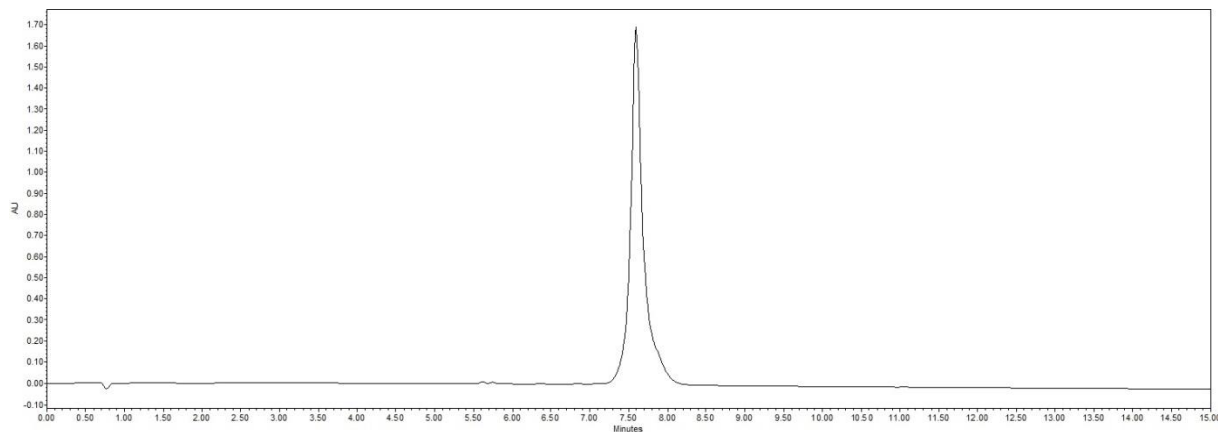

**Figure S12.** RP-HPLC profile of **2**:  $t_R = 7.60$  min. (0-40% solv.B in 15 min.).



### Compound 3.

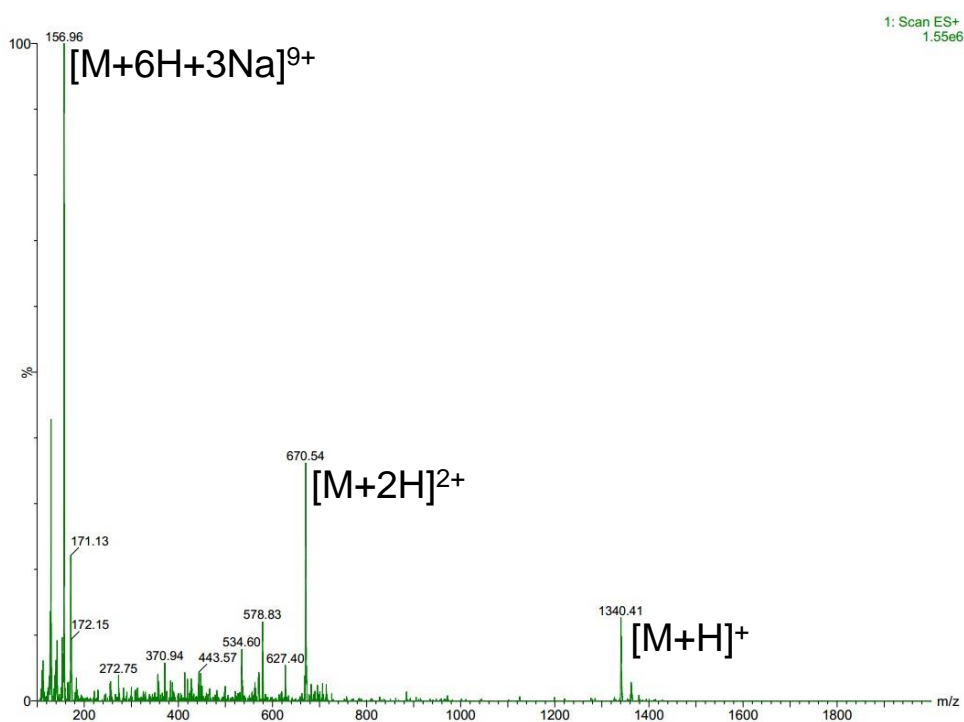

**Figure S13.** ESI<sup>+</sup>-MS spectrum of **3**. *m/z* (Monoisotopic Mwt) calcd. for C<sub>57</sub>H<sub>102</sub>N<sub>19</sub>O<sub>18</sub> [M+H]<sup>+</sup>: 1340.8, found: 1340.4 ; calcd. for C<sub>57</sub>H<sub>103</sub>N<sub>19</sub>O<sub>18</sub> [M+2H]<sup>2+</sup>: 670.9, found: 670.5 ; C<sub>57</sub>H<sub>107</sub>N<sub>19</sub>O<sub>18</sub> Na<sub>3</sub> [M+6H+3Na]<sup>9+</sup>: 157.2, found: 157.0

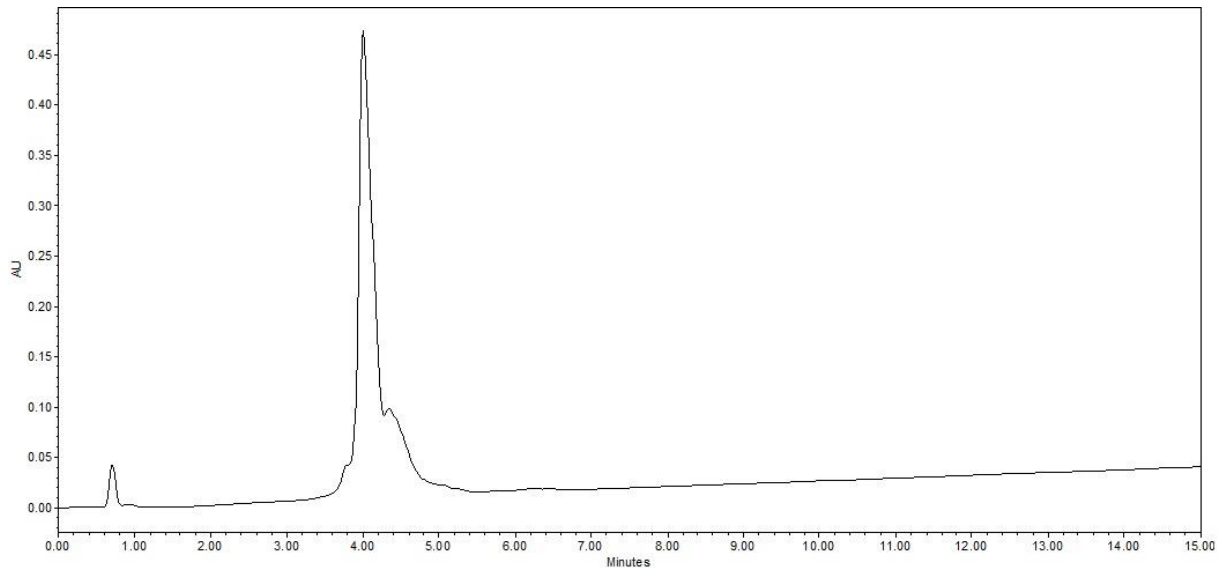

**Figure S14.** RP-HPLC profile of **3**: *t<sub>R</sub>* = 4.00 min. (0-30% solv.B in 15 min.).

## Compound 4.

1: (Time: 0.11) Combine (2:8-8:11)

1: TOF MS ES+  
1.5e+006

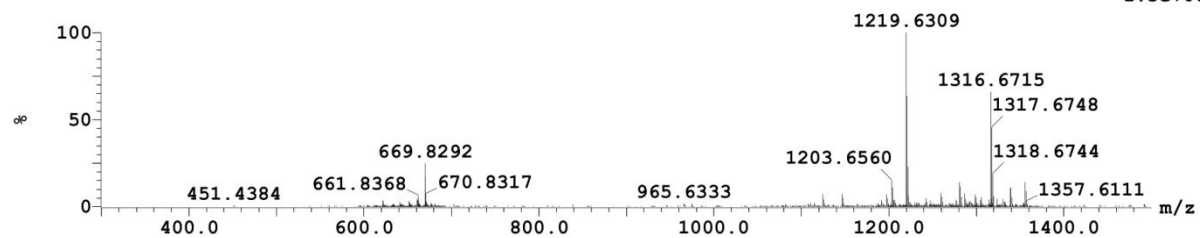

**Figure S15.** HRMS (ESI<sup>+</sup>-TOF) of **4**: *m/z* (Monoisotopic Mwt) calcd. for C<sub>55</sub>H<sub>94</sub>N<sub>15</sub>O<sub>22</sub> [M+H<sub>2</sub>O+H]<sup>+</sup>: 1316.6698, found: 1316.6715

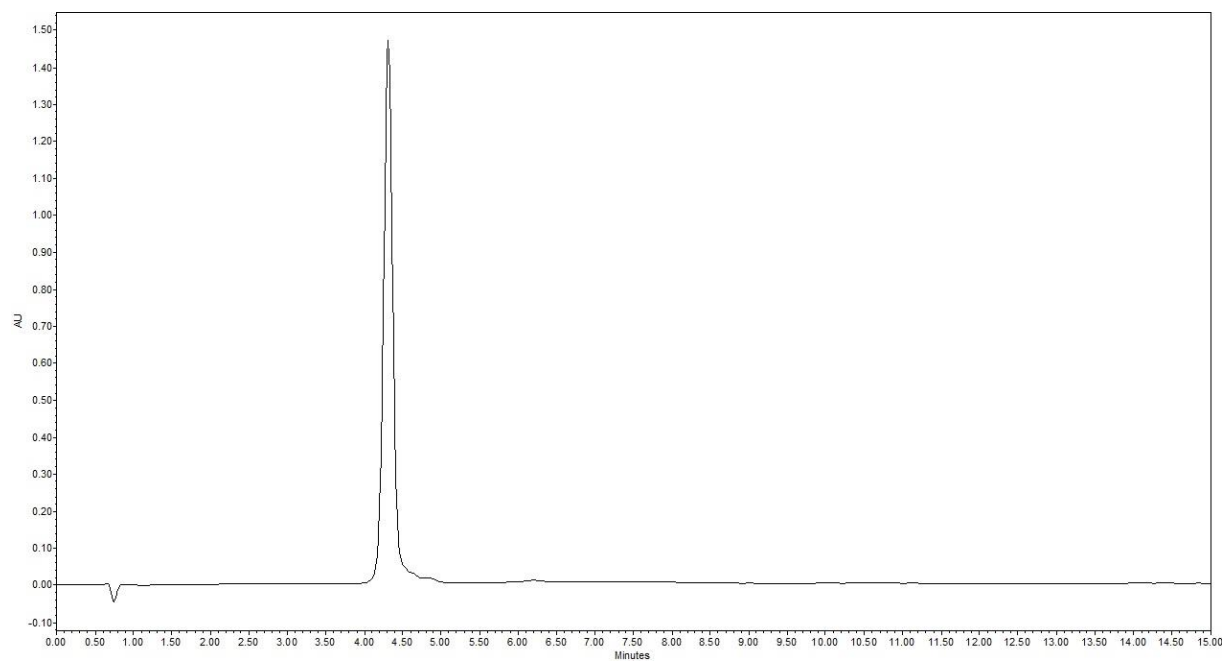

**Figure S16.** RP-HPLC profile of **4**: *t<sub>R</sub>* = 4.31 min. (0-40% solv.B in 15 min.).

## Compound 5.

1: (Time: 0.13) Combine (3:9-15:18)

1: TOF MS ES+  
3.4e+004

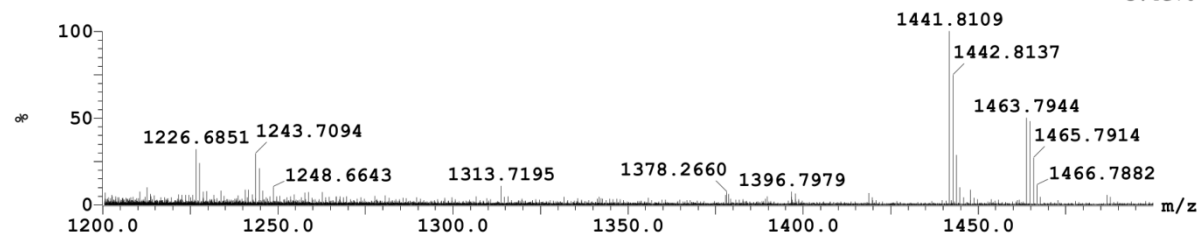

**Figure S17.** HRMS (ESI<sup>+</sup>-TOF) of **5**: *m/z* (Monoisotopic Mwt) calcd. for C<sub>61</sub>H<sub>109</sub>N<sub>20</sub>O<sub>20</sub> [M+H]<sup>+</sup>: 1441.8127, found: 1441.8109 ; calcd. for C<sub>61</sub>H<sub>108</sub>N<sub>20</sub>O<sub>20</sub>Na [M+Na]<sup>+</sup>: 1463.7946, found: 1463.7944

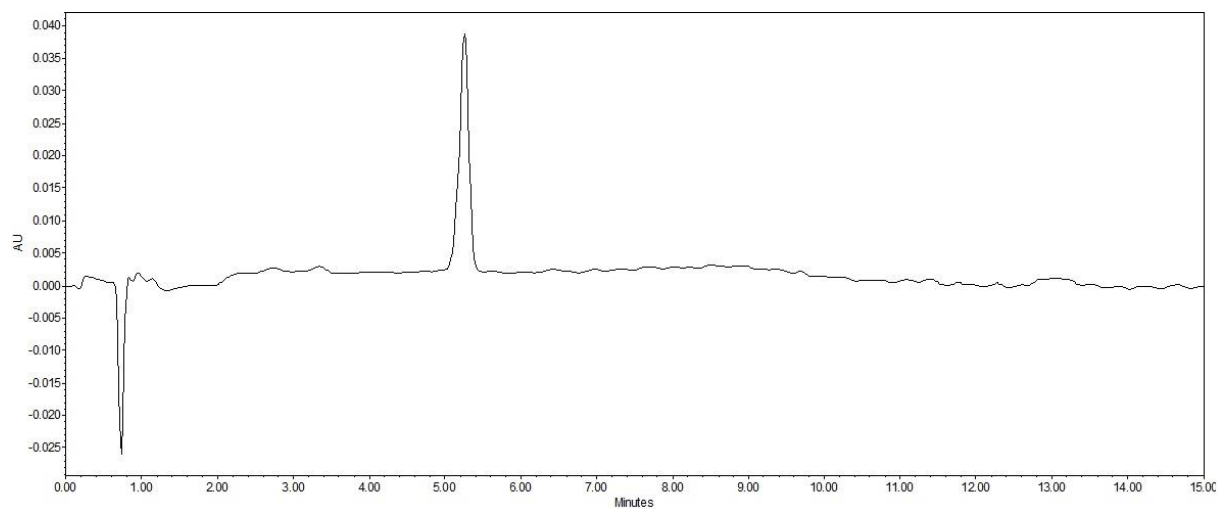

**Figure S18.** RP-HPLC profile of **5**: *t<sub>R</sub>* = 5.25 min. (0-30% solv.B in 15 min.).

## Compound 6.

1: (Time: 0.13) Combine (5:7-10:13)

1: TOF MS ES+  
1.5e+006

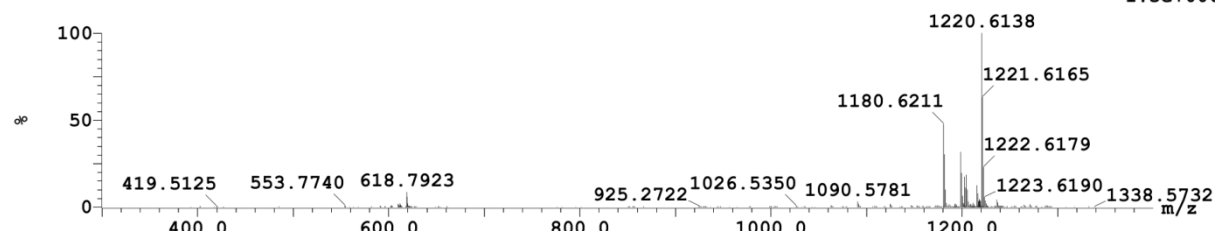

**Figure S19.** HRMS (ESI<sup>+</sup>-TOF) of **6**:  $m/z$  (Monoisotopic Mwt) calcd. for  $C_{49}H_{78}N_{23}O_{12}$   $[M+H]^+$ : 1180.6200, found: 1180.6211 ; calcd. for  $C_{49}H_{79}N_{23}O_{13}Na$   $[M+H_2O+Na]^+$ : 1220.6125, found: 1220.6138

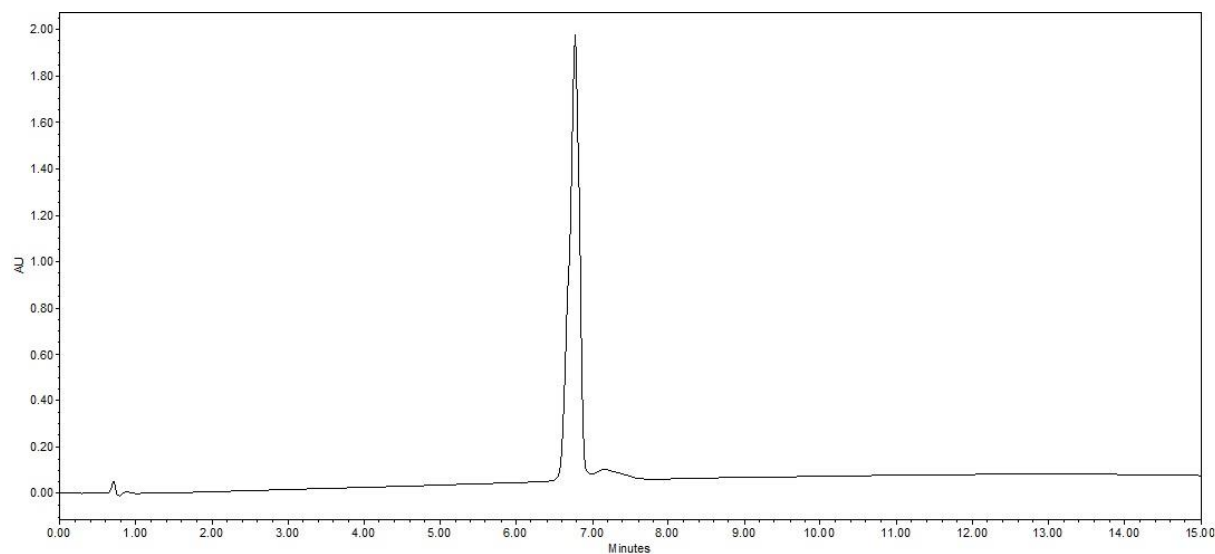

**Figure S20.** RP-HPLC profile of **6**:  $t_R$  = 6.78 min. (5-100% solv.B in 15 min.).

## Compound 7.

1: (Time: 0.13) Combine (3:7-14:16)

1: TOF MS ES+  
2.0e+005

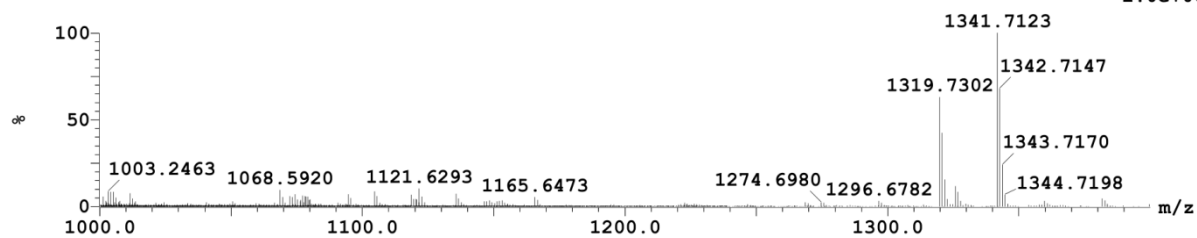

**Figure S21.** HRMS (ESI<sup>+</sup>-TOF) of **7**:  $m/z$  (Monoisotopic Mwt) calcd. for  $C_{55}H_{95}N_{22}O_{16}$   $[M+H]^+$ : 1319.7296, found: 1319.7302 ; calcd. for  $C_{55}H_{94}N_{22}O_{16}Na$   $[M+Na]^+$ : 1341.7116, found: 1341.7123

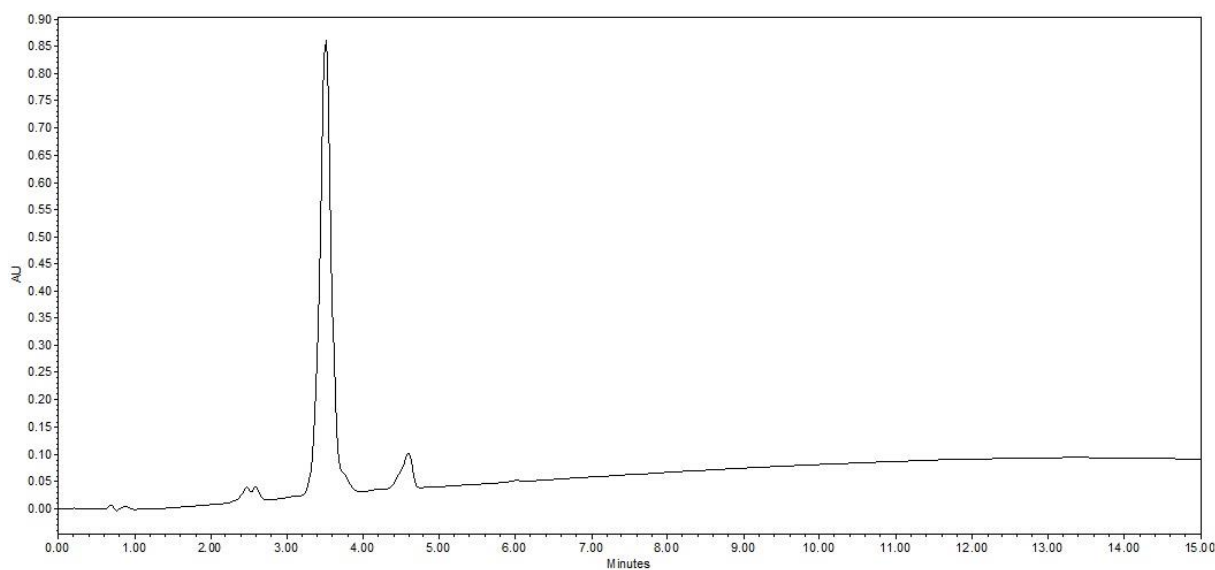

**Figure S22.** RP-HPLC profile of **7**:  $t_R$  = 3.52 min. (5-100% solv.B in 15 min.).

## Compound 9 .

Propargyl ( $\beta$ -D-galactopyranosyl)-(1-3)-2-acetamido-2-deoxy- $\alpha$ -D-galactopyranoside.

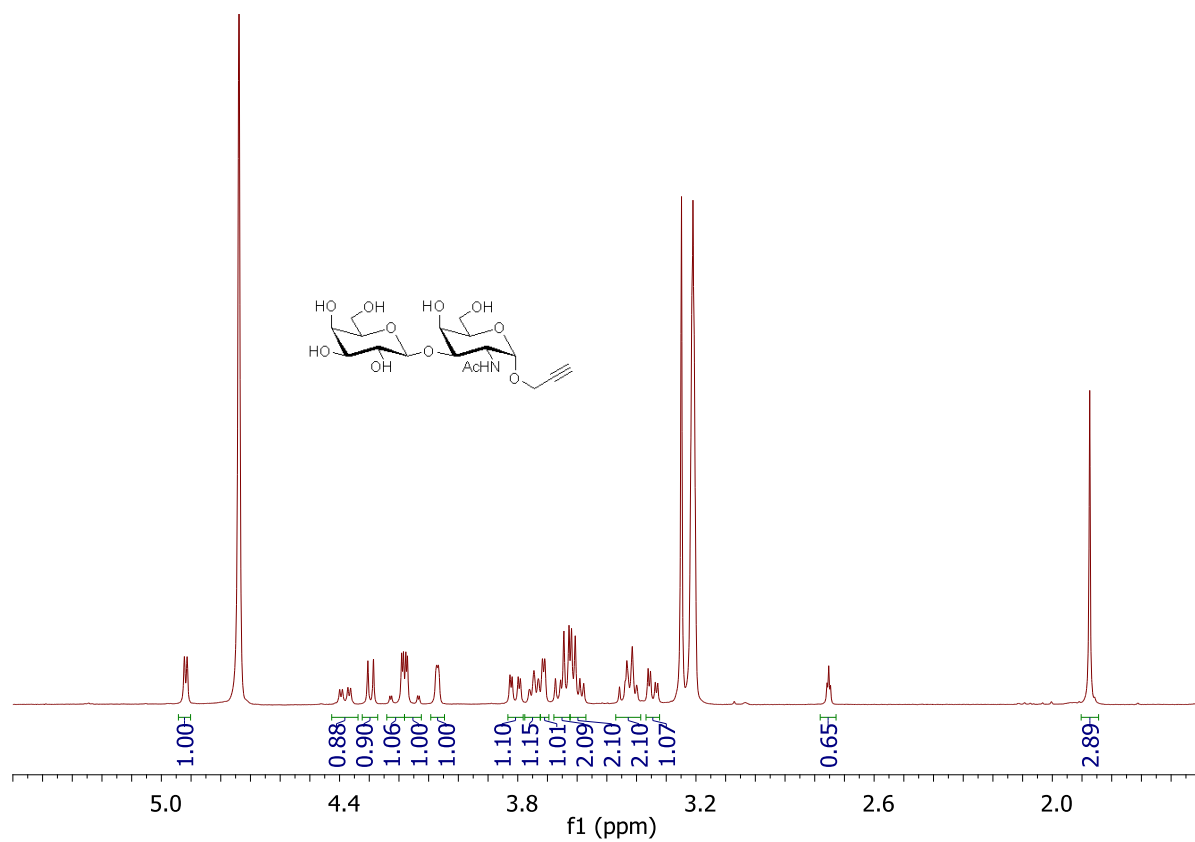

**Figure S23.**  $^1\text{H}$  spectrum of compound 9 ( $\text{D}_2\text{O}$ , 400 MHz).

## Compound 13.

Propargyl 2-acetamido-4,6-*O*-benzylidene-2-deoxy- $\alpha$ -D-galactopyranoside.

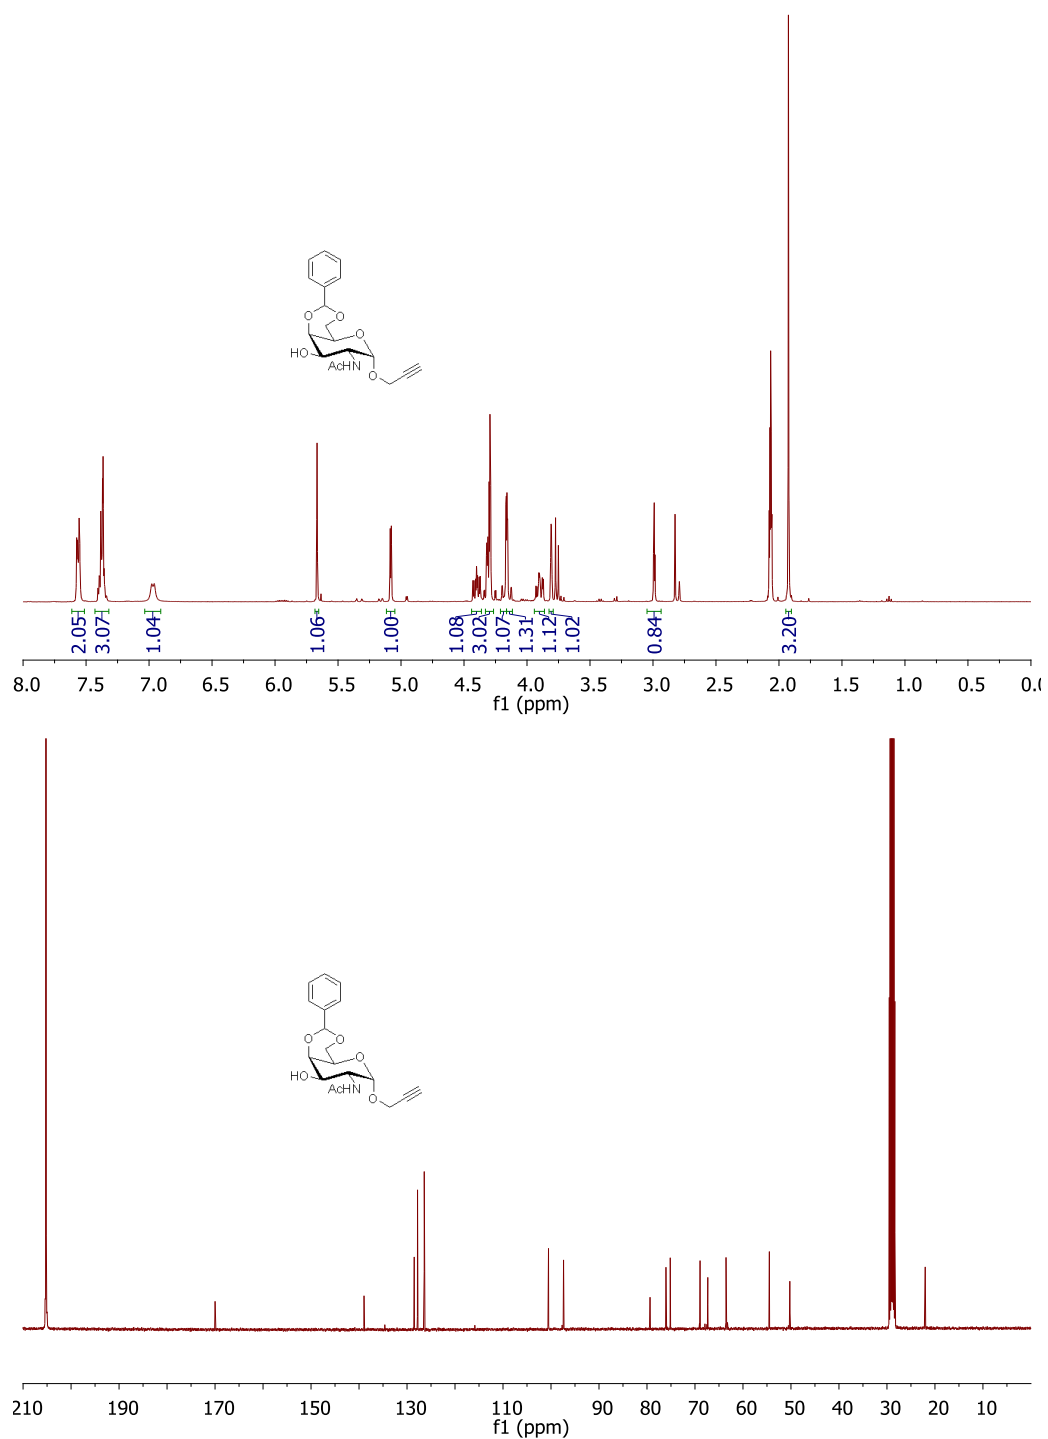

Figure S24.  $^1\text{H}$  (400 MHz,  $\text{CD}_3\text{OD}$ ) and  $^{13}\text{C}$  (100 MHz,  $\text{CD}_3\text{OD}$ ) NMR spectra of compound 13.

## Compound 15.

Propargyl (2,3,4,6-tetra-*O*-acetyl- $\beta$ -D-galactopyranosyl)-(1-3)-2-acetamido-4,6-*O*-benzilidene-2-deoxy- $\alpha$ -D-galactopyranoside.

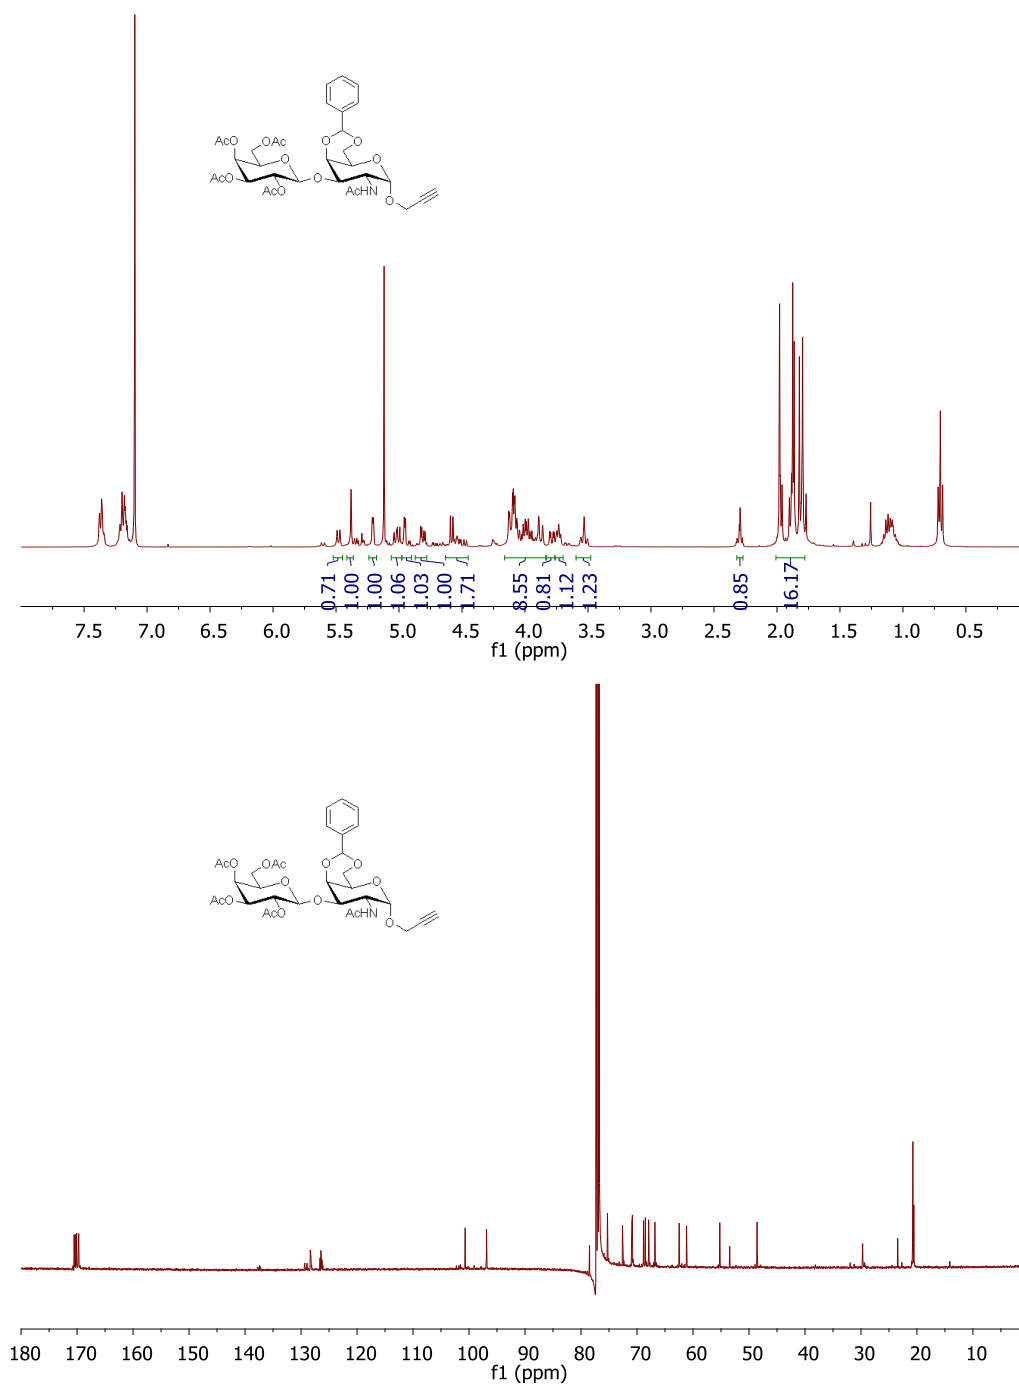

Figure S25.  $^1\text{H}$  (400 MHz,  $\text{CDCl}_3$ ) and  $^{13}\text{C}$  (100 MHz,  $\text{CDCl}_3$ ) NMR spectra of compound 15.



## Compound 16.

1: (Time: 0.10) Combine (3:5-7:9)

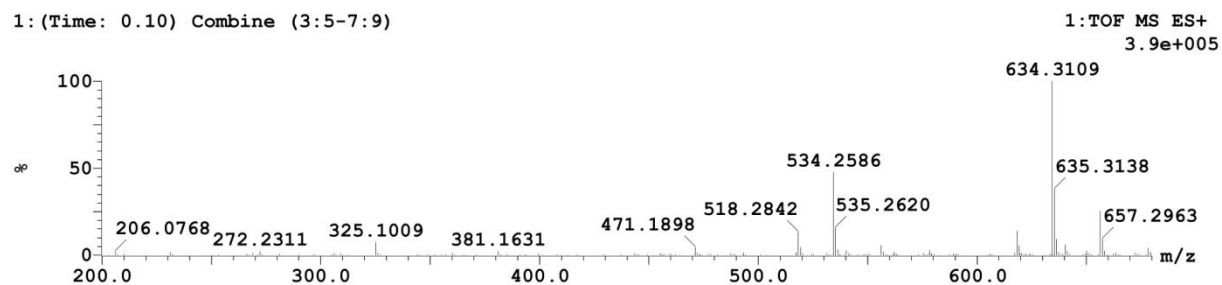

**Figure S26.** HRMS (ESI<sup>+</sup>-TOF) of **16**: *m/z* (Monoisotopic Mwt) calcd. for C<sub>33</sub>H<sub>45</sub>N<sub>3</sub>O<sub>8</sub>Na [M+Na]<sup>+</sup>: 634.3104, found: 634.3109

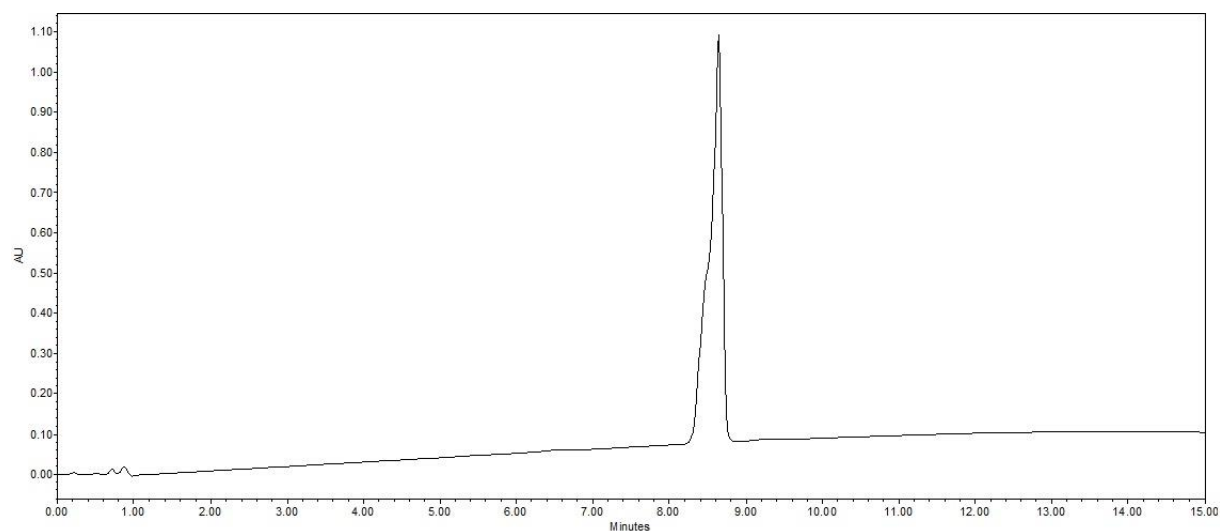

**Figure S27.** RP-HPLC profile of **16**: *t<sub>R</sub>* = 8.64 min. (5-100% solv.B in 15 min.).

## Compound 17.

1: (Time: 0.13) Combine (3:9-21)

1: TOF MS ES+  
5.8e+004

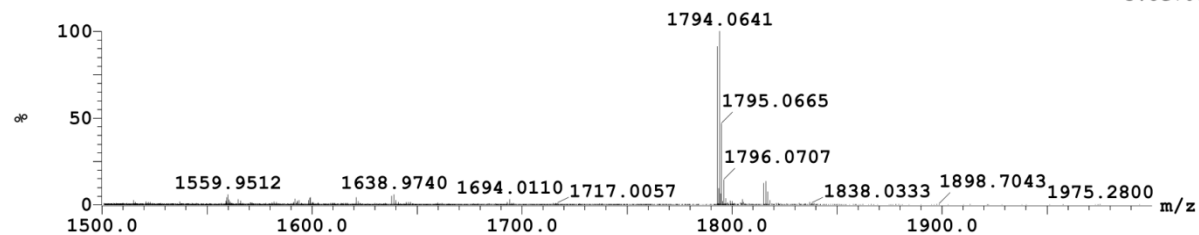

**Figure S28.** HRMS (ESI<sup>+</sup>-TOF) of the linear form of compound **17** resulting from cleavage of sequence **A**:  $m/z$  (Monoisotopic Mwt) calcd. for  $C_{84}H_{146}N_{17}O_{25} [M+H]^+$ : 1794.0706, found: 1794.0641

1: (Time: 0.13) Combine (3:9-21)

1: TOF MS ES+  
3.5e+005

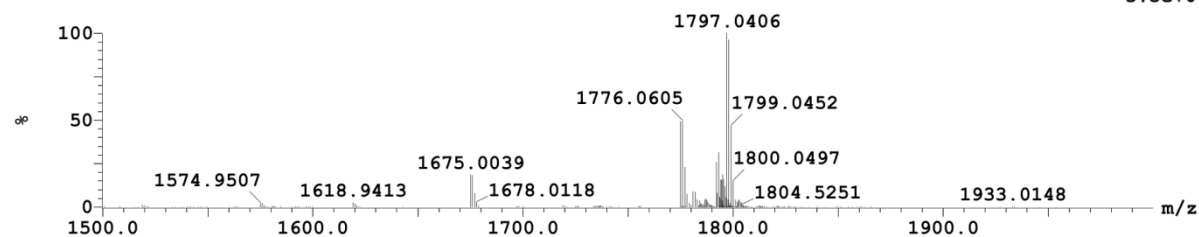

**Figure S29.** HRMS (ESI<sup>+</sup>-TOF) of **17**:  $m/z$  (Monoisotopic Mwt) calcd. for  $C_{84}H_{144}N_{17}O_{24} [M+H]^+$ : 1776.0600, found: 1776.0605 ; calcd. for  $C_{84}H_{143}N_{17}O_{24}Na [M+Na]^+$ : 1797.0390, 1797.0406

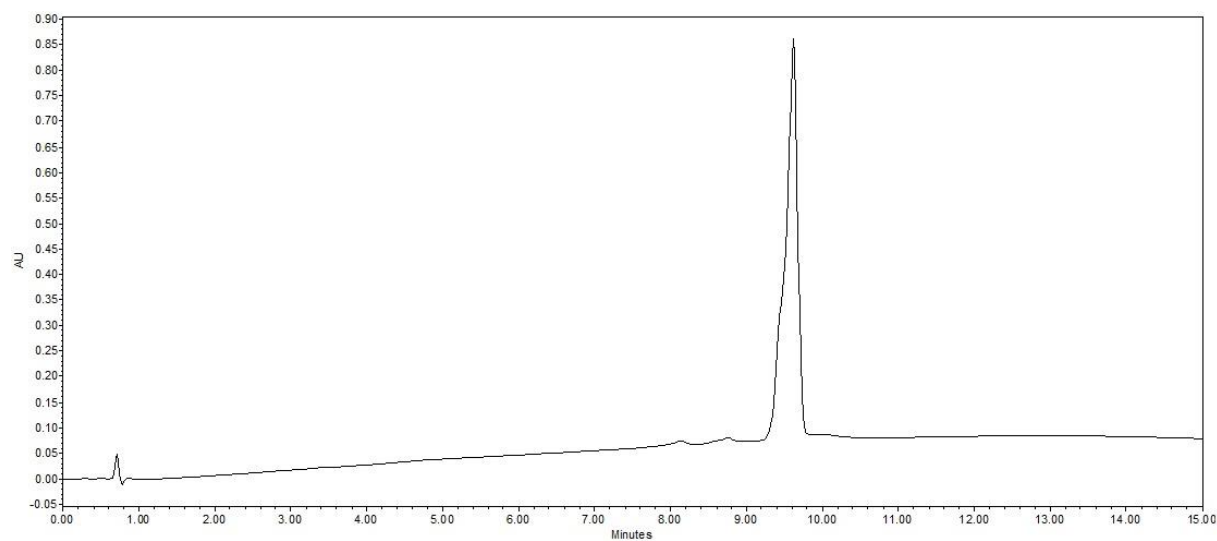

**Figure S30.** RP-HPLC profile of **17**:  $t_R = 9.62$  min. (5-100% solv.B in 15 min.).

## Compound 18.

CPIF\_152 4 (0.104) Cm (4:5)

1: TOF MS ES+  
9.39e+002

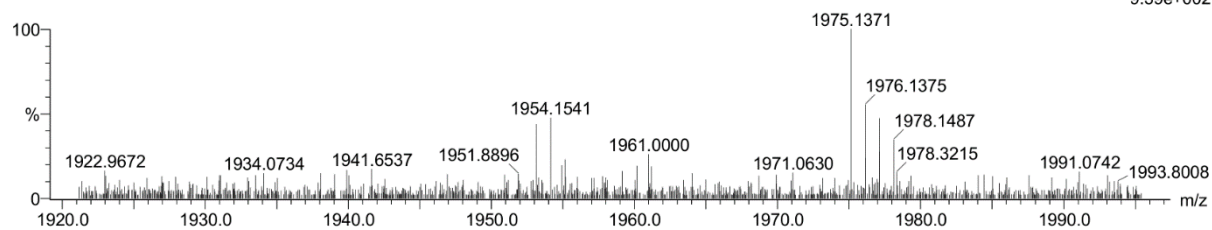

**Figure S31.** HRMS (ESI<sup>+</sup>-TOF) of **18**: *m/z* (Monoisotopic Mwt) calcd. for C<sub>90</sub>H<sub>157</sub>N<sub>19</sub>O<sub>28</sub>Na [M+ Na]<sup>+</sup>: 1975.1343, found: 1975.1371

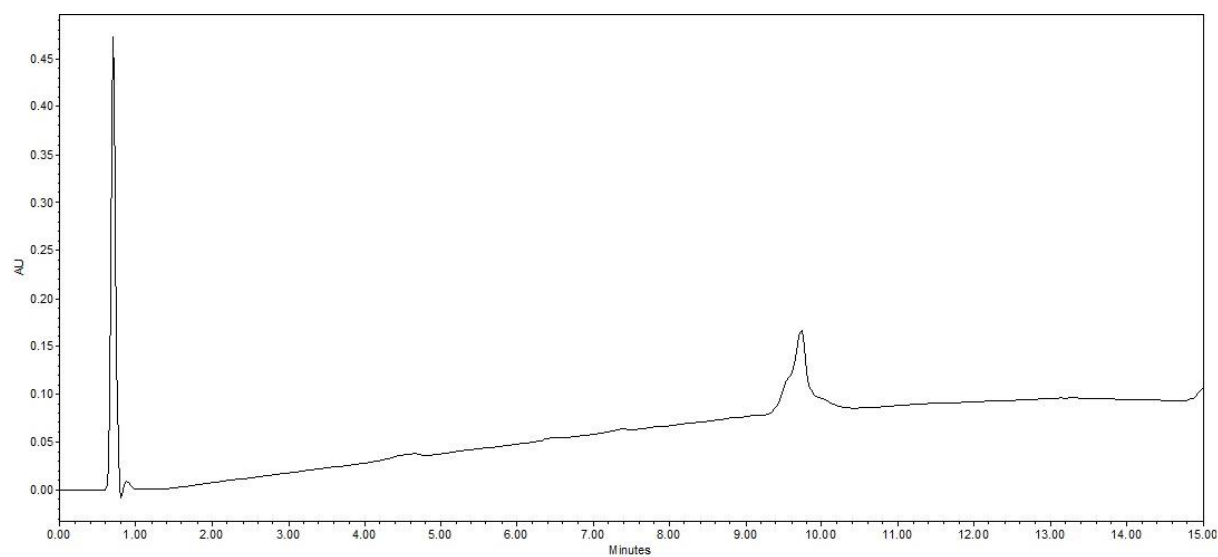

**Figure S32.** RP-HPLC profile of **18**: *t<sub>R</sub>*= 9.72 min. (5-100% solv.B in 15 min.).

## Compound 19.

1: (Time: 0.10) Combine (3:5-7:9)

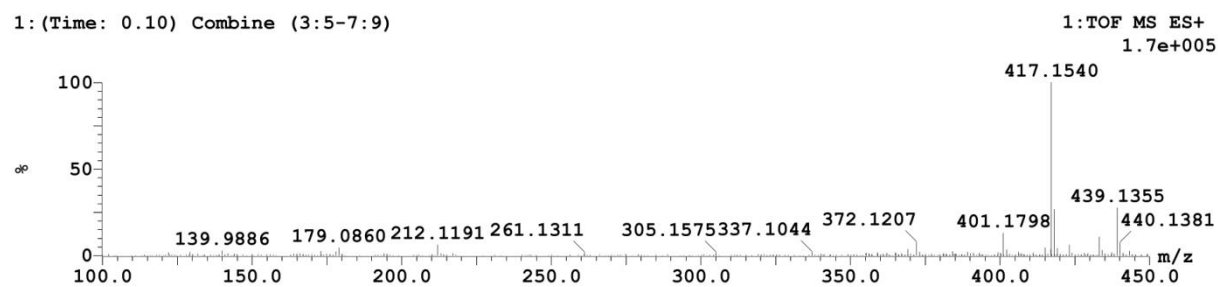

**Figure S33.** HRMS (ESI<sup>+</sup>-TOF) of **19**: *m/z* (Monoisotopic Mwt) calcd. for C<sub>21</sub>H<sub>22</sub>N<sub>4</sub>O<sub>4</sub>Na [M+ Na]<sup>+</sup>:  
417.1539 found: 417.1540

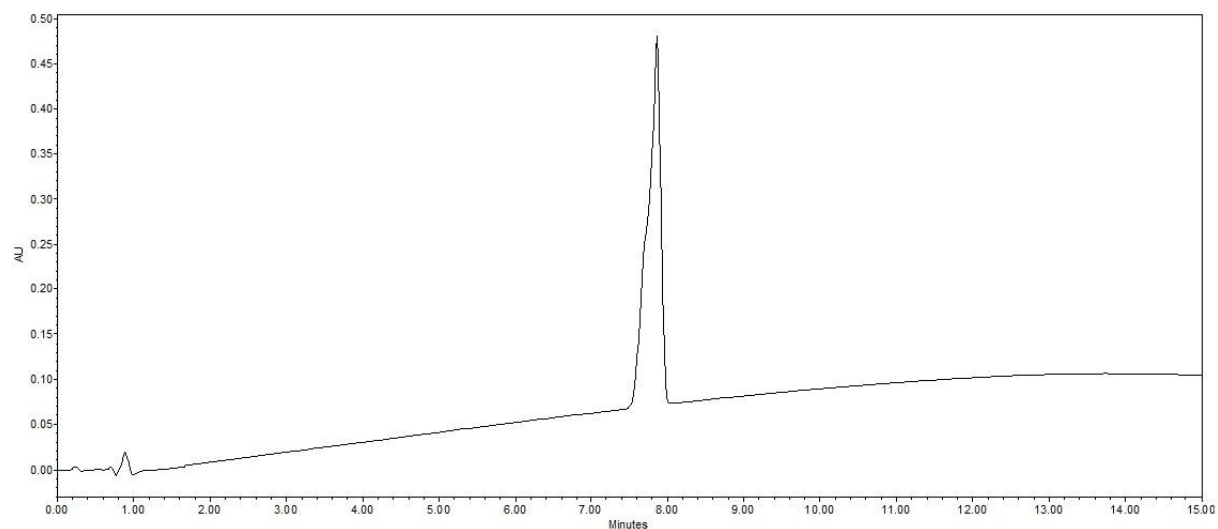

**Figure S34.** RP-HPLC profile of **19**: *t<sub>R</sub>*= 7.86 min. (5-100% solv.B in 15 min.).

## Compound 20.

1: (Time: 0.13) Combine (3:9-21)

1: TOF MS ES+  
6.5e+005

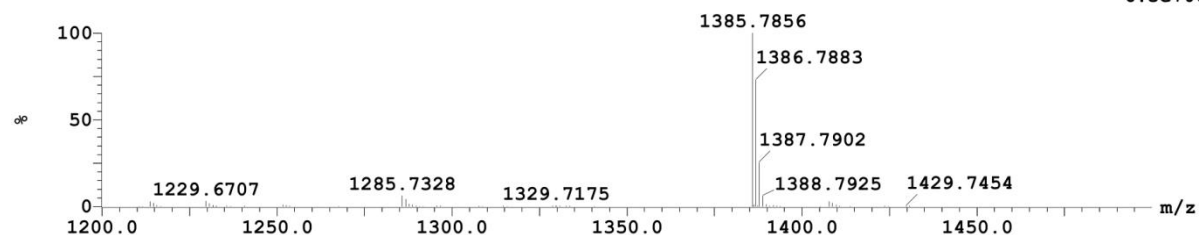

**Figure S35.** HRMS (ESI<sup>+</sup>-TOF) of the linear form of compound **20** resulting from cleavage of sequence **B**: *m/z* (Monoisotopic Mwt) calcd. for C<sub>59</sub>H<sub>101</sub>N<sub>24</sub>O<sub>15</sub> [M+H]<sup>+</sup>: 1385.7878, found: 1385.7856

1: (Time: 0.13) Combine (3:9-21)

1: TOF MS ES+  
1.0e+005

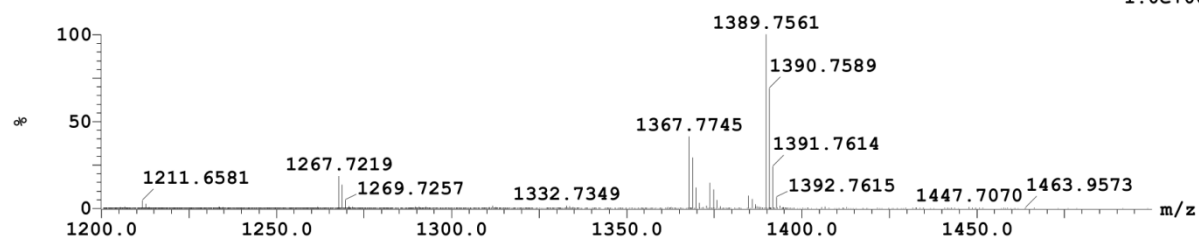

**Figure S36.** HRMS (ESI<sup>+</sup>-TOF) of **20**: *m/z* (Monoisotopic Mwt) calcd. for C<sub>59</sub>H<sub>99</sub>N<sub>24</sub>O<sub>14</sub> [M+H]<sup>+</sup>: 1367.7773, found: 1367.7745 ; calcd. for C<sub>59</sub>H<sub>98</sub>N<sub>24</sub>O<sub>14</sub>Na [M+Na]<sup>+</sup>: 1389.7592, found: 1389.7561

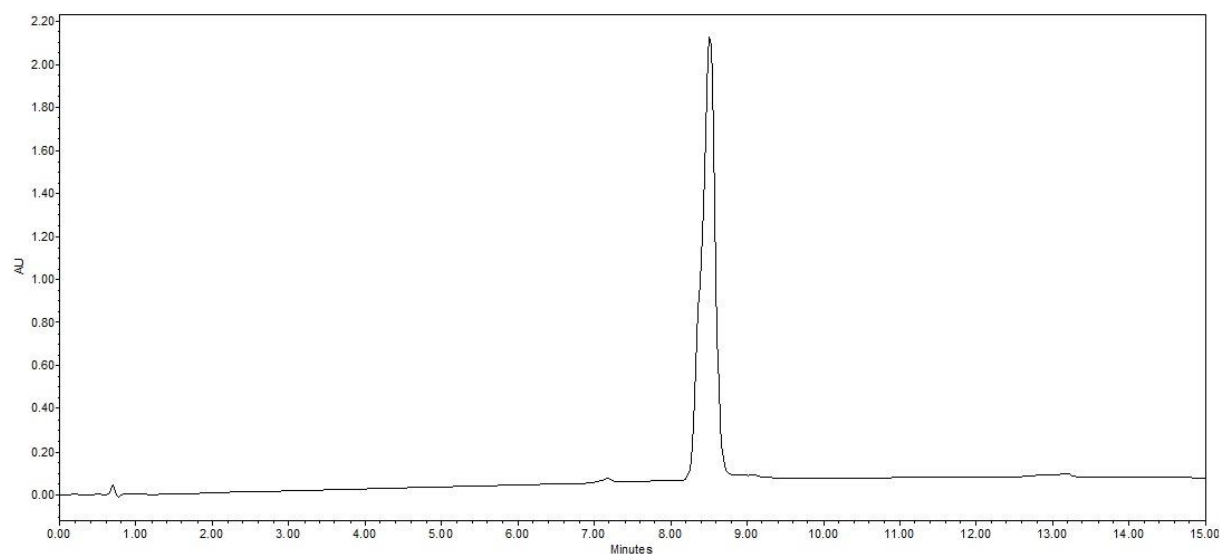

**Figure S37.** RP-HPLC profile of **20**: *t<sub>R</sub>* = 8.52 min. (5-100% solv.B in 15 min.).

## Compound 21.

1: (Time: 0.13) Combine (3:9-21)

1: TOF MS ES+  
3.3e+05

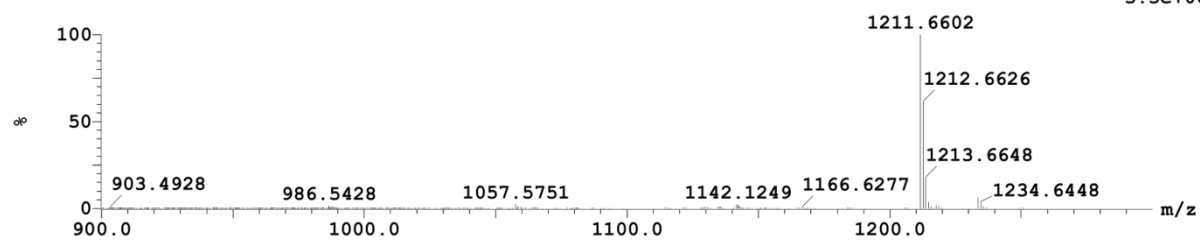

**Figure S38.** HRMS (ESI<sup>+</sup>-TOF) of **21**: *m/z* (Monoisotopic Mwt) calcd. for C<sub>50</sub>H<sub>83</sub>N<sub>24</sub>O<sub>12</sub> [M+H]<sup>+</sup>: 1211.6622, found: 1211.6602

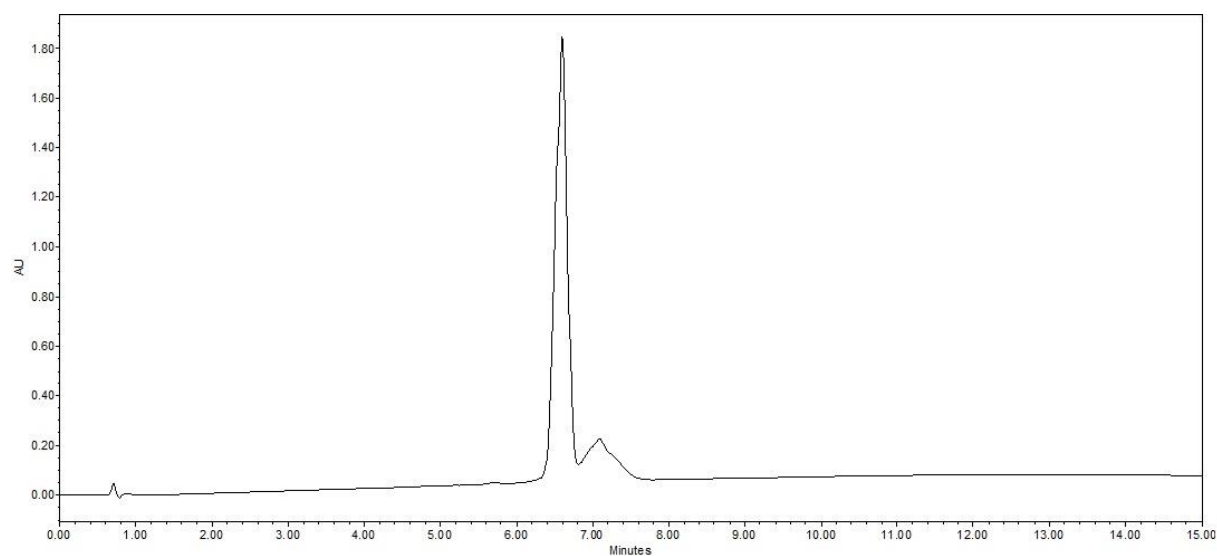

**Figure S39.** RP-HPLC profile of **21**: *t<sub>R</sub>* = 6.59 min. (5-100% solv.B in 15 min.).

## Compound 22.

1: (Time: 0.13) Combine (3:9-20:21)

1: TOF MS ES+  
3.7e+005

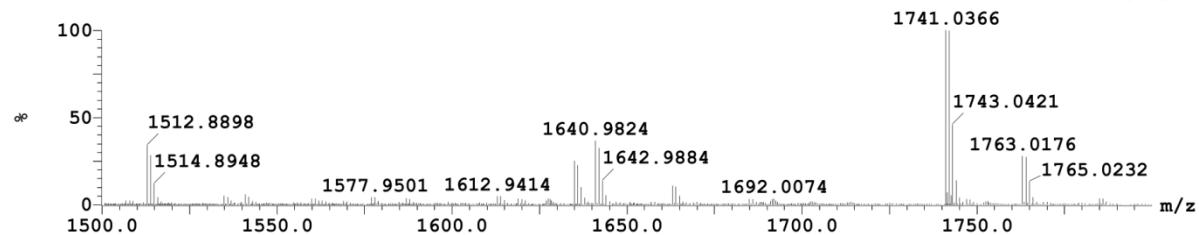

**Figure S40.** HRMS (ESI<sup>+</sup>-TOF) of the linear form of compound **22** resulting from cleavage of sequence **C**:  $m/z$  (Monoisotopic Mwt) calcd. for C<sub>81</sub>H<sub>138</sub>N<sub>21</sub>O<sub>21</sub> [M+H]<sup>+</sup>: 1741.0376, found: 1741.0366 ; calcd. for C<sub>81</sub>H<sub>137</sub>N<sub>21</sub>O<sub>21</sub>Na [M+Na]<sup>+</sup>: 1763.0196, found: 1763.0176

1: (Time: 0.13) Combine (3:9-12:15)

1: TOF MS ES+  
2.8e+004

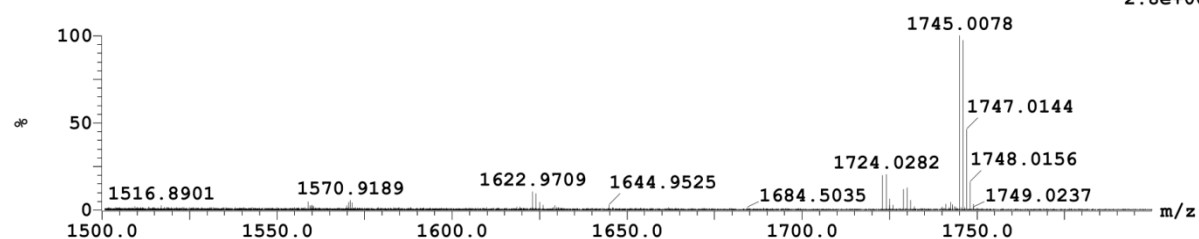

**Figure S41.** HRMS (ESI<sup>+</sup>-TOF) of **22**:  $m/z$  (Monoisotopic Mwt) calcd. for C<sub>81</sub>H<sub>136</sub>N<sub>21</sub>O<sub>20</sub> [M+H]<sup>+</sup>: 1724.0300, found: 1724.0282 ; calcd. for C<sub>81</sub>H<sub>135</sub>N<sub>21</sub>O<sub>20</sub>Na [M+Na]<sup>+</sup>: 1745.0090, found: 1745.0078

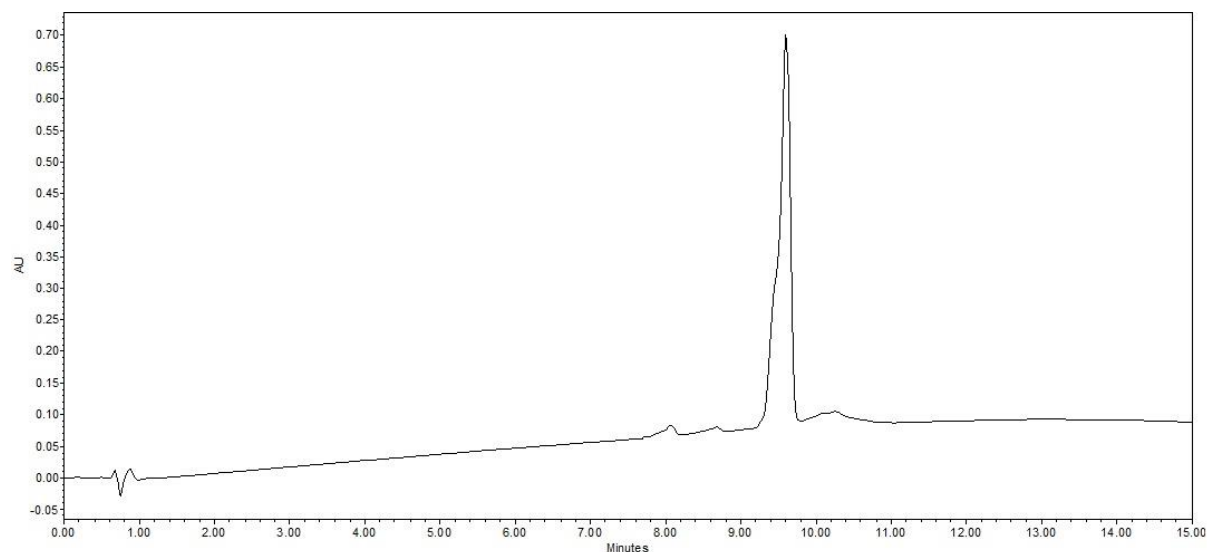

**Figure S42.** RP-HPLC profile of **22**:  $t_R$  = 9.60 min. (5-100% solv.B in 15 min.).

## Compound 23.

1: (Time: 0.13) Combine (3:9-21)

1: TOF MS ES+  
8.6e+005

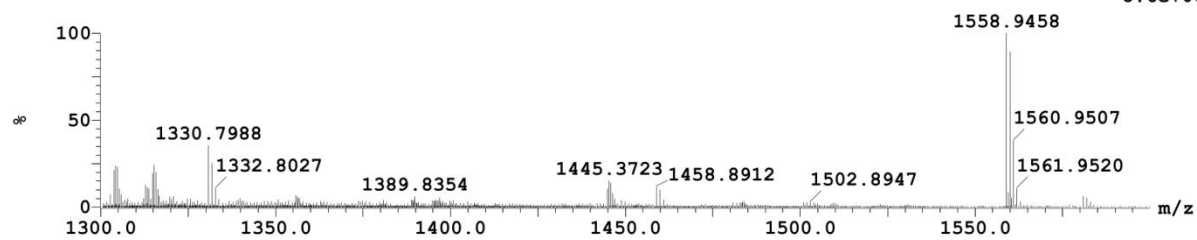

**Figure S43.** HRMS (ESI<sup>+</sup>-TOF) of **23**:  $m/z$  (Monoisotopic Mwt) calcd. for  $C_{71}H_{124}N_{21}O_{18}$   $[M+H]^+$ : 1558.9433, found: 1558.9458

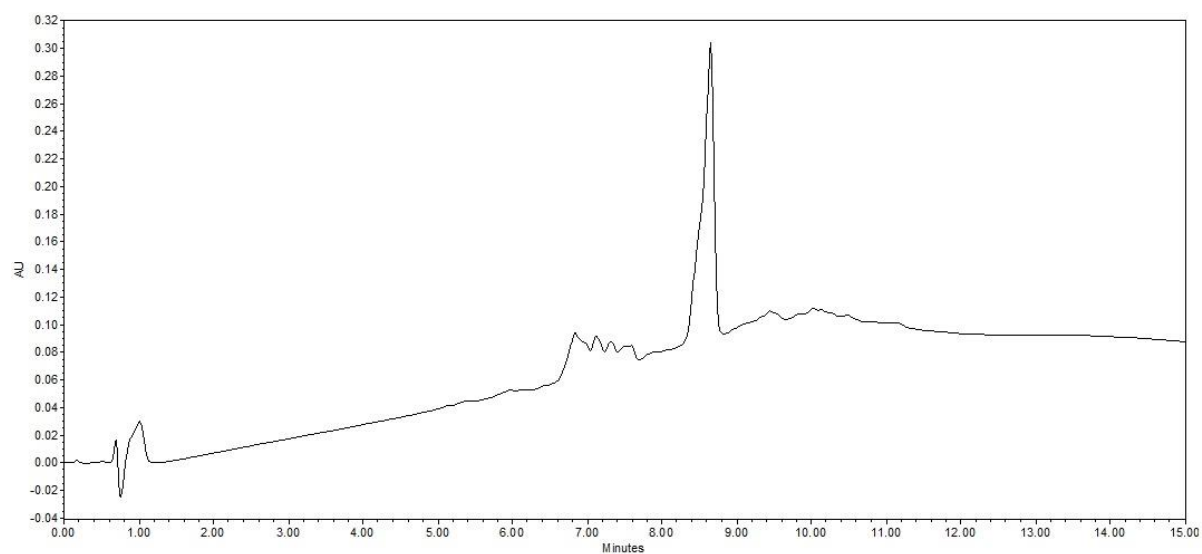

**Figure S44.** RP-HPLC profile of **23**:  $t_R = 8.65$  min. (5-100% solv.B in 15 min.).



## Compound 24.

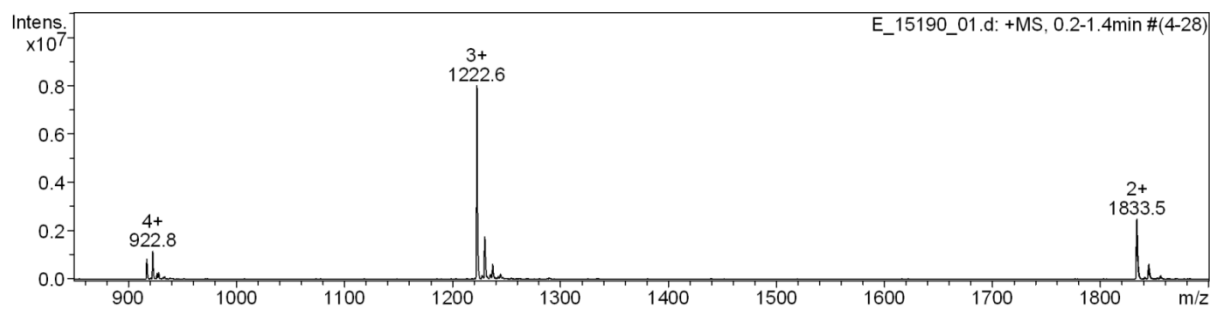

**Figure S45.** ESI<sup>+</sup>-MS spectrum of **24**. *m/z* (Average Mwt) calcd. for C<sub>155</sub>H<sub>253</sub>N<sub>65</sub>O<sub>40</sub> [M+2H]<sup>2+</sup>: 1833.5, found: 1833.5 ; calcd. for C<sub>155</sub>H<sub>254</sub>N<sub>65</sub>O<sub>40</sub> [M+3H]<sup>3+</sup>: 1222.7, found: 1222.6 ; calcd. for C<sub>155</sub>H<sub>254</sub>N<sub>65</sub>O<sub>40</sub> [M+3H+Na]<sup>4+</sup>: 922.8, found: 922.8

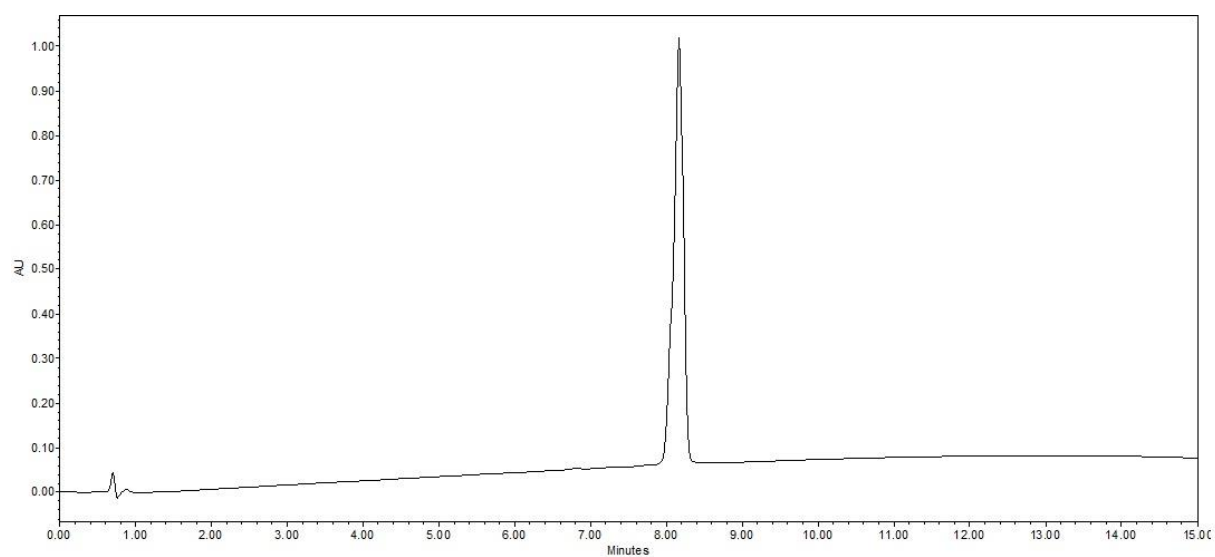

**Figure S46.** RP-HPLC profile of **24**: *t<sub>R</sub>*= 8.17 min. (5-100% solv.B in 15 min.).

## Compound 25.

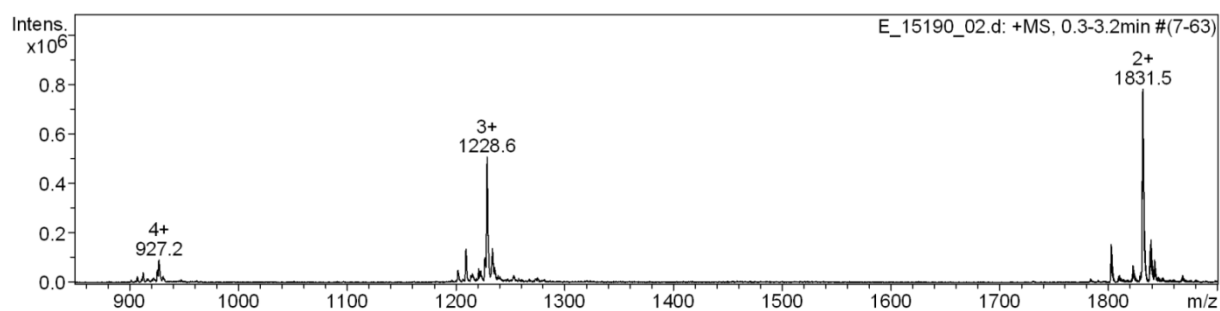

**Figure S47.** ESI<sup>+</sup>-MS spectrum of **25**. *m/z* (Average Mwt) calcd. for C<sub>153</sub>H<sub>246</sub>N<sub>63</sub>O<sub>42</sub>Na [M+H<sub>2</sub>O+H+Na]<sup>2+</sup>: 1831.5, found: 1831.5 ; calcd. for C<sub>153</sub>H<sub>246</sub>N<sub>63</sub>O<sub>42</sub>Na<sub>2</sub> [M+H<sub>2</sub>O+H+2Na]<sup>3+</sup>: 1228.7, found: 1228.6 ; calcd. for C<sub>153</sub>H<sub>246</sub>N<sub>63</sub>O<sub>42</sub>Na<sub>3</sub> [M+H<sub>2</sub>O+H+3Na]<sup>4+</sup>: 927.2, found: 927.2

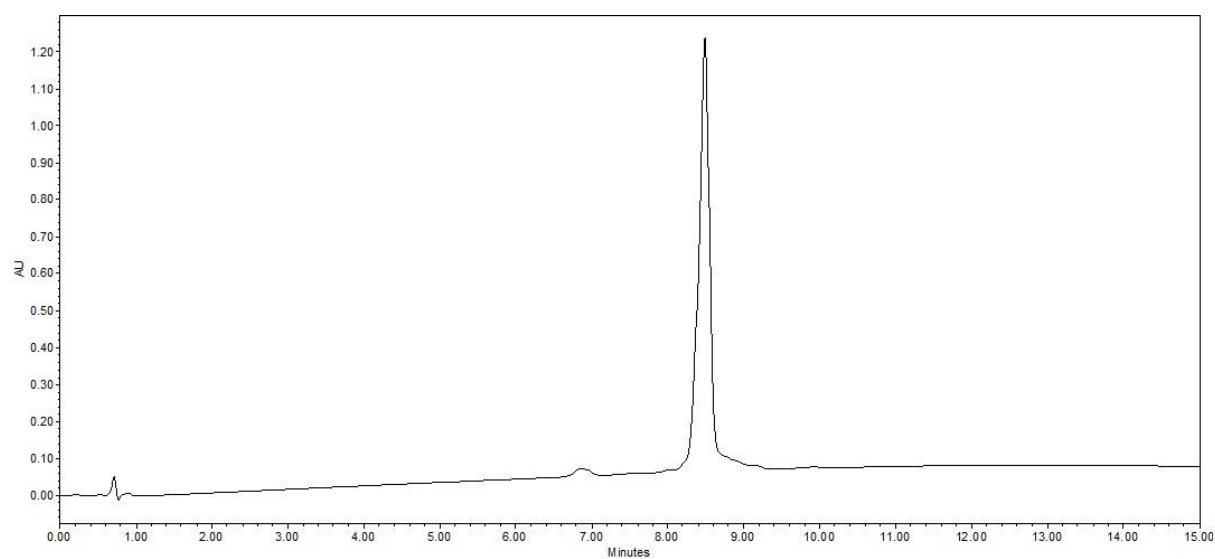

**Figure S48.** RP-HPLC profile of **25**: *t<sub>R</sub>*= 8.49 min. (5-100% solv.B in 15 min.).

## Compound 26.

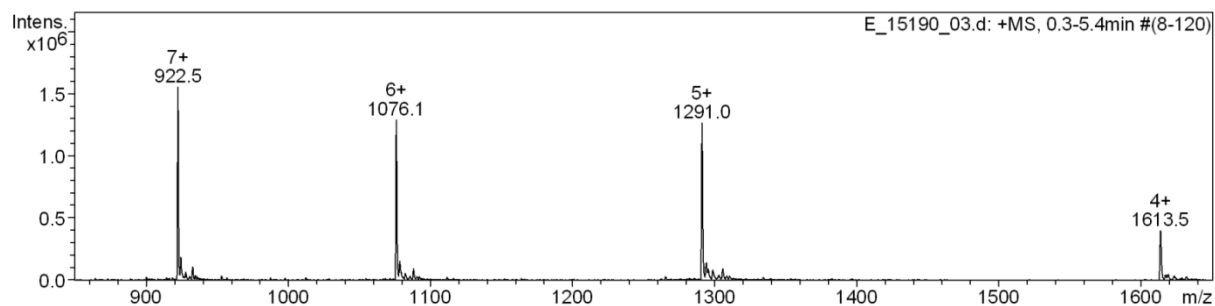

**Figure S49.** ESI<sup>+</sup>-MS spectrum of **26**. *m/z* (Average Mwt) calcd. for C<sub>275</sub>H<sub>457</sub>N<sub>103</sub>O<sub>78</sub> [M+4H]<sup>4+</sup>:1613.6, found: 1613.5 ; calcd. for C<sub>275</sub>H<sub>458</sub>N<sub>103</sub>O<sub>78</sub> [M+5H]<sup>5+</sup>: 1291.0, found: 1291.0 ; calcd. for C<sub>275</sub>H<sub>459</sub>N<sub>103</sub>O<sub>78</sub> [M+6H]<sup>6+</sup>: 1076.0, found: 1076.1 ; calcd. for C<sub>275</sub>H<sub>460</sub>N<sub>103</sub>O<sub>78</sub> [M+7H]<sup>7+</sup>: 922.5, found: 922.5

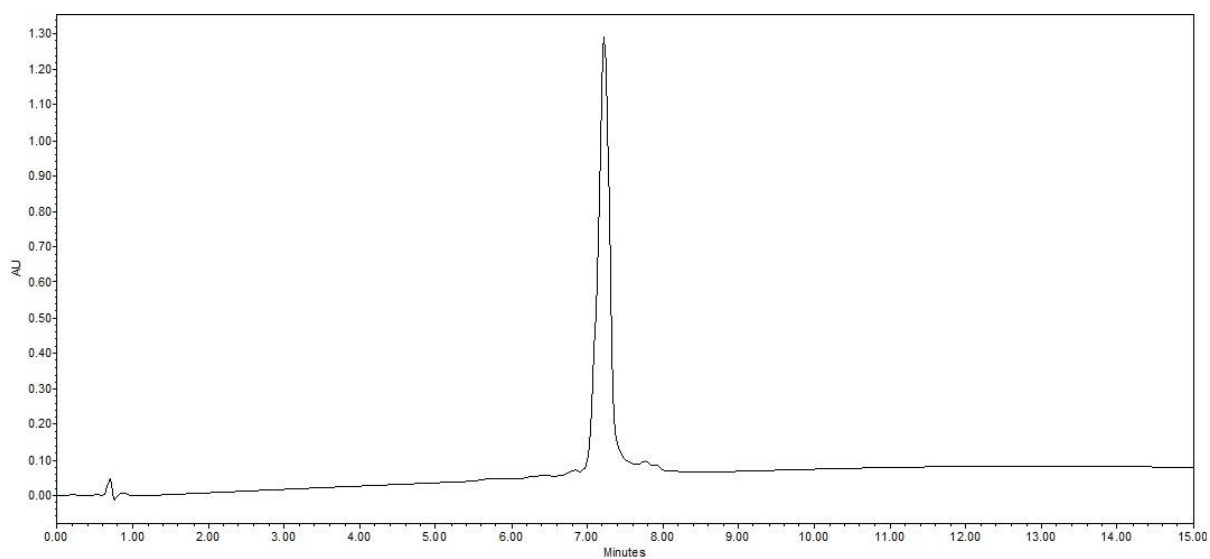

**Figure S50.** RP-HPLC profile of **26**: *t<sub>R</sub>*= 7.23 min. (5-100% solv.B in 15 min.).

## Compound 27.

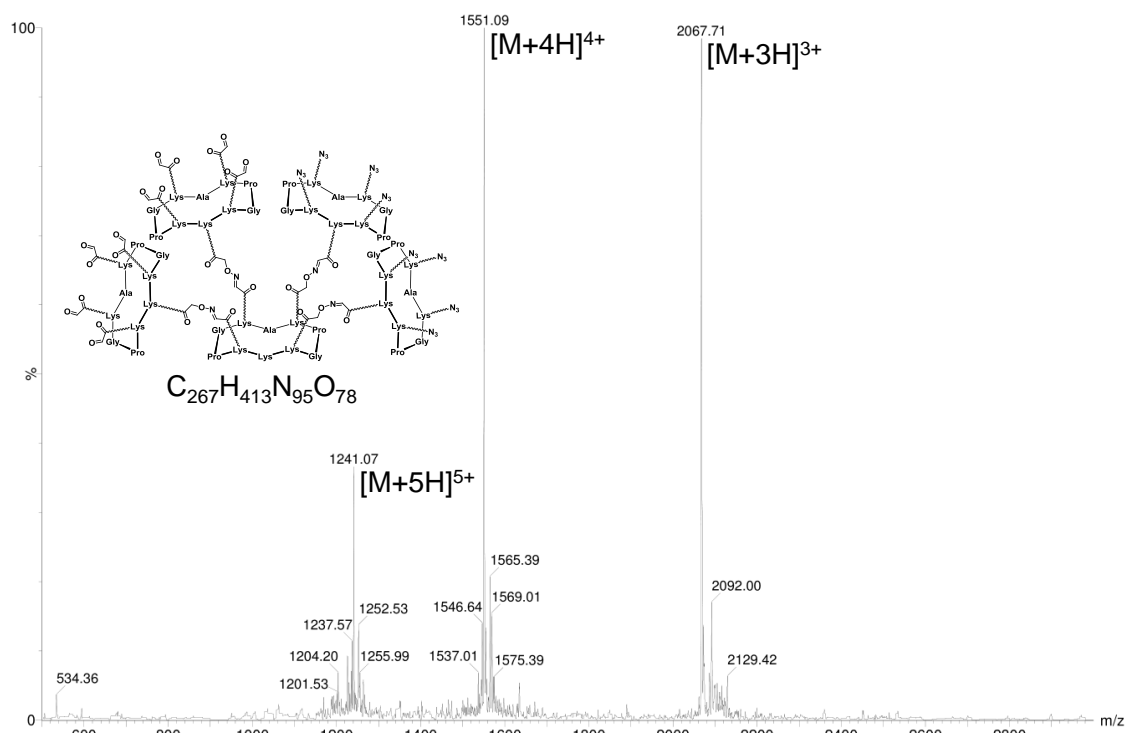

**Figure S51.** ESI-MS spectrum of **27**.  $m/z$  (Average Mwt) calcd. for  $C_{267}H_{416}N_{95}O_{78}$   $[M+3H]^{3+}$ : 2068.2, found: 2067.7; calcd. for  $C_{267}H_{417}N_{95}O_{78}$   $[M+4H]^{4+}$ : 1551.4, found: 1551.1; calcd. for  $C_{267}H_{418}N_{95}O_{78}$   $[M+5H]^{5+}$ : 1241.4, found: 1241.1

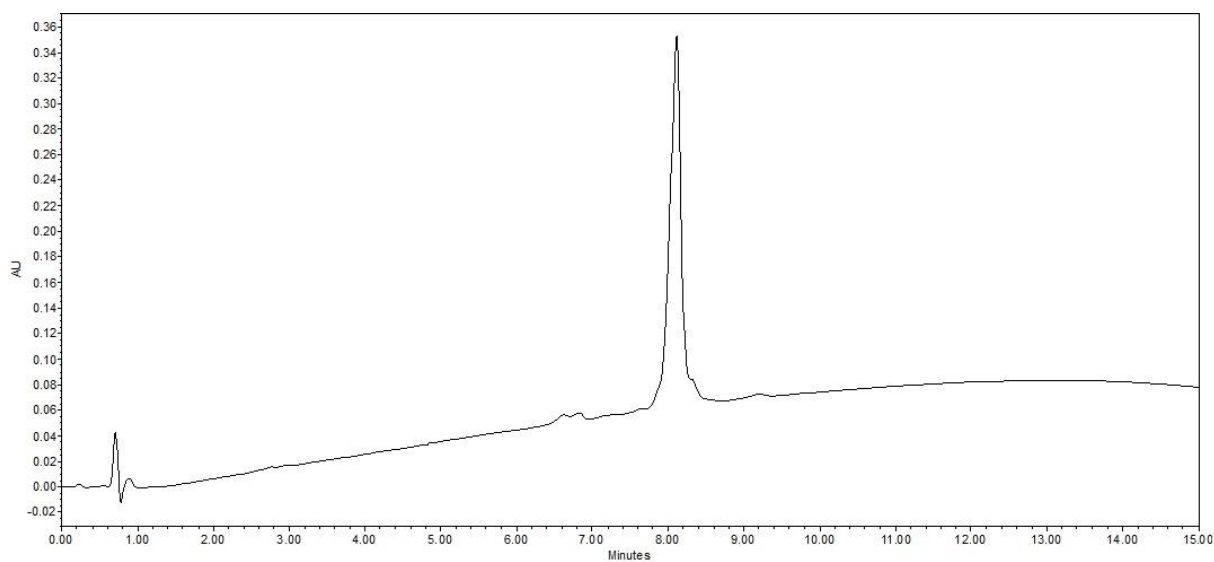

**Figure S52.** RP-HPLC profile of **27**:  $t_R = 8.11$  min. (5-100% solv.B in 15 min.).

## Compound 28.

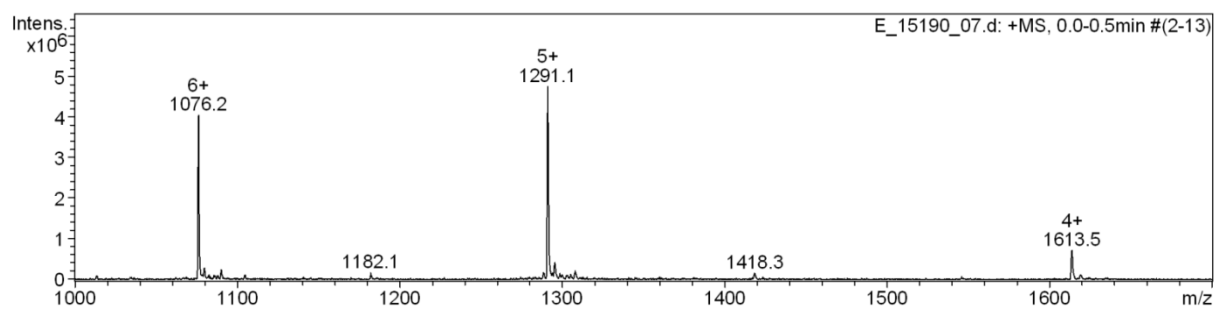

**Figure S53.** ESI<sup>+</sup>-MS spectrum of **28**. *m/z* (Average Mwt) calcd. for C<sub>275</sub>H<sub>457</sub>N<sub>103</sub>O<sub>78</sub> [M+4H]<sup>4+</sup>:1613.6, found: 1613.5 ; calcd. for C<sub>275</sub>H<sub>458</sub>N<sub>103</sub>O<sub>78</sub> [M+5H]<sup>5+</sup>: 1291.0, found: 1291.1 ; calcd. for C<sub>275</sub>H<sub>459</sub>N<sub>103</sub>O<sub>78</sub> [M+6H]<sup>6+</sup>: 1076.0, found: 1076.2

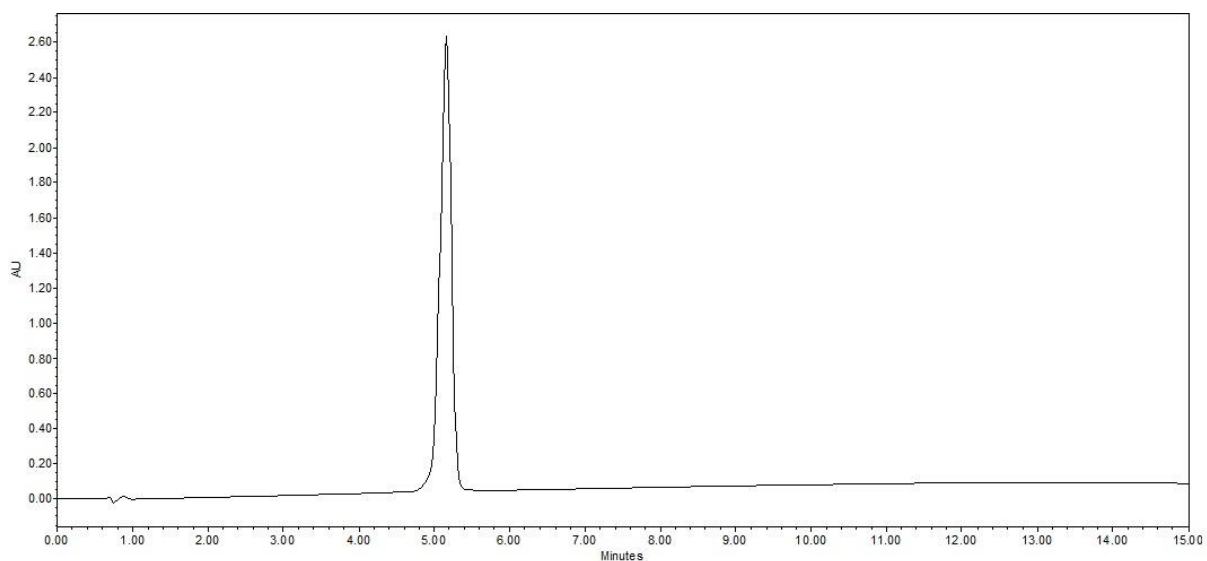

**Figure S54.** RP-HPLC profile of **28**: *t<sub>R</sub>*= 4.31 min. (5-100% solv.B in 15 min.).

## Compound 29.

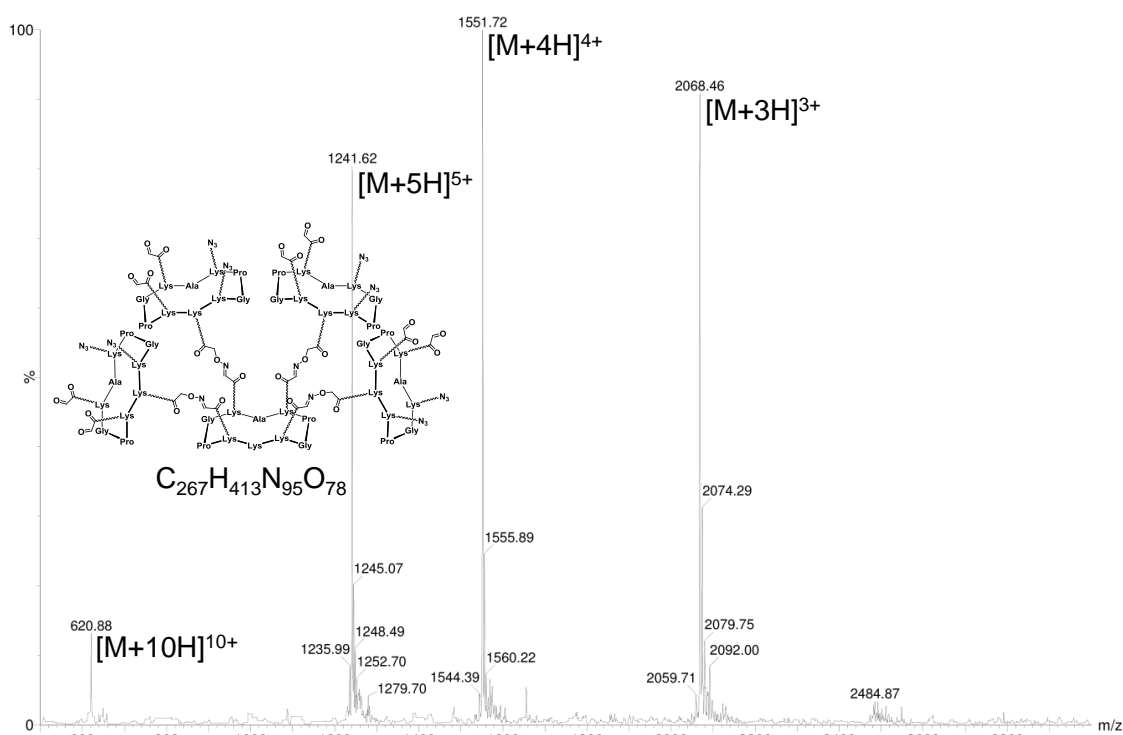

**Figure S55.** ESI+-MS spectrum of **29**.  $m/z$  (Average Mwt) calcd. for  $C_{267}H_{416}N_{95}O_{78}$   $[M+3H]^{3+}$ : 2068.3, found: 2068.5 ; calcd. for  $C_{267}H_{417}N_{95}O_{78}$   $[M+4H]^{4+}$ : 1551.4, found: 1551.7 ; calcd. for  $C_{267}H_{418}N_{95}O_{78}$   $[M+5H]^{5+}$ : 1241.4, found: 1241.6 ;  $C_{267}H_{423}N_{95}O_{78}$   $[M+10H]^{10+}$ : 621.2, found: 620.9

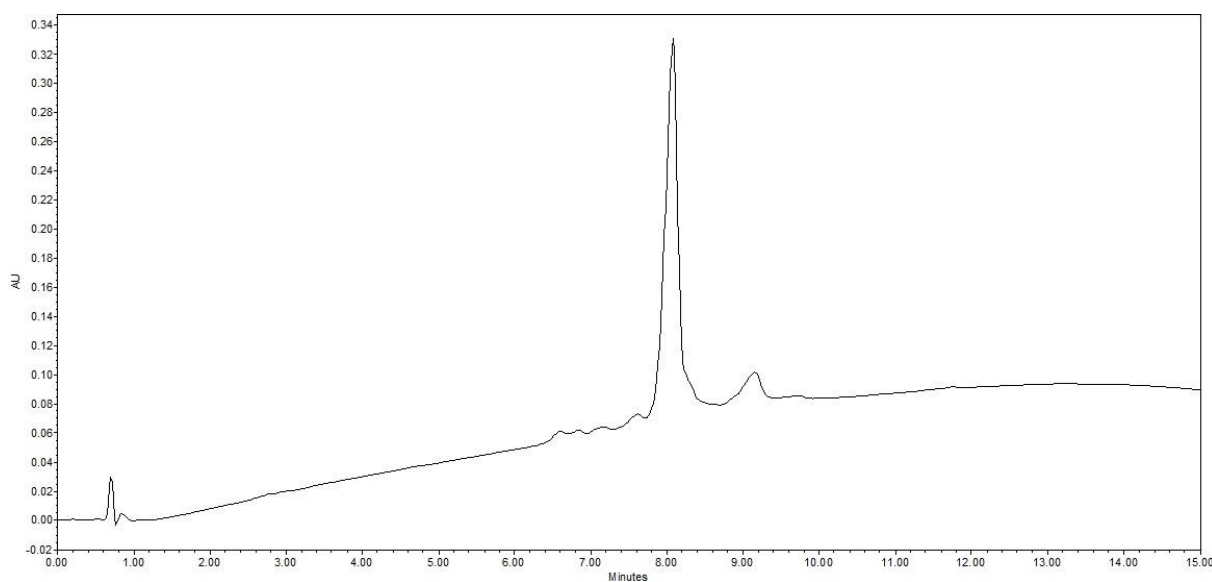

**Figure S56.** RP-HPLC profile of **29**:  $t_R$  = 8.08 min. (5-100% solv.B in 15 min.).

## Compound 30.

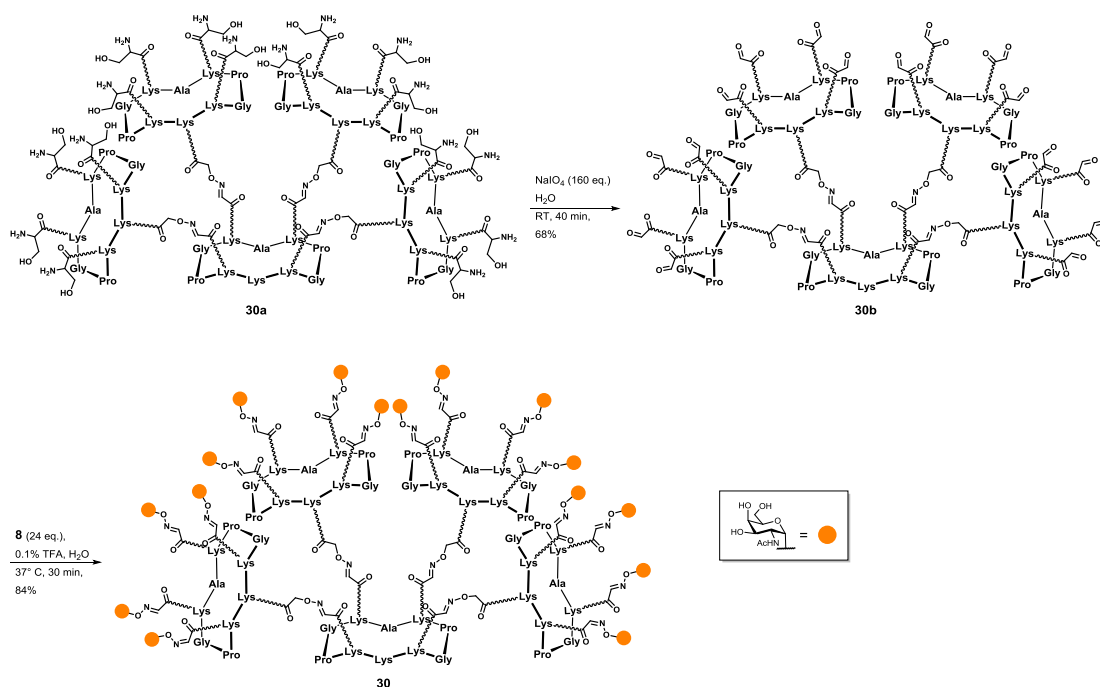

**Scheme S1.** Synthesis of compound **30**.

### Synthesis of compound **30b**.

To a solution of compound **30a**<sup>1</sup> (9.7 mg, 1.4  $\mu\text{mol}$ ) in  $\text{H}_2\text{O}$  (1.0 mL), sodium periodate (47.9 mg, 224  $\mu\text{mol}$ ) was added and the reaction mixture stirred at room temperature for 40 minutes. Direct RP-HPLC purification, followed by lyophilization afforded compound **30b** (6.1 mg) in 68% yield.

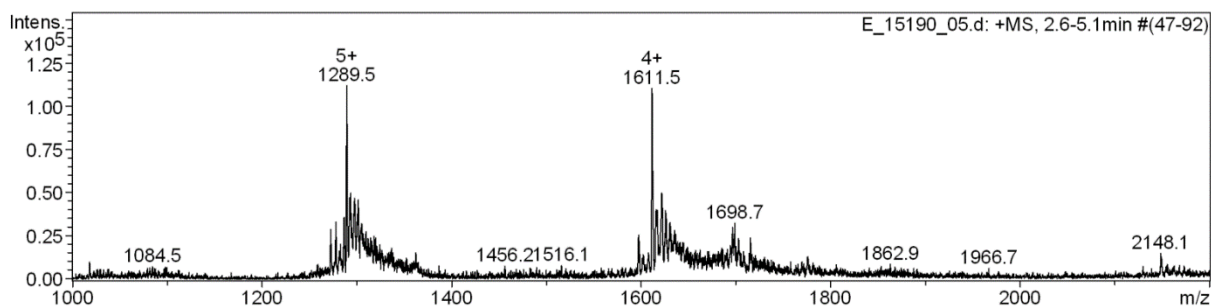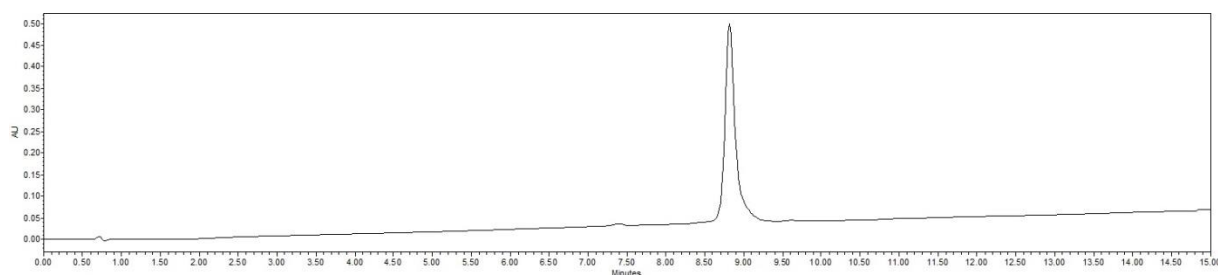

### Synthesis of compound **30**.

To a solution of compound **30b** (5.8 mg, 0.9  $\mu\text{mol}$ ) in  $\text{H}_2\text{O}$  (1.0 mL) containing 0.09%  $\text{CF}_3\text{CO}_2\text{H}$ , **8** (5.1 mg, 21.6  $\mu\text{mol}$ ) was added and the reaction heated at  $37^\circ\text{C}$  without stirring. After 30 minutes the reaction mixture was directly purified by preparative RP-HPLC and lyophilized to afford pure **30** (7.5 mg) in 84% yield. ESI<sup>+</sup>-MS  $m/z$  (Average Mwt) calcd. for  $\text{C}_{411}\text{H}_{657}\text{N}_{111}\text{O}_{174}$   $[\text{M}+4\text{H}]^{4+}$ : 2484.3, found: 2484.9 ; calcd. for  $\text{C}_{411}\text{H}_{658}\text{N}_{111}\text{O}_{174}$   $[\text{M}+5\text{H}]^{5+}$ : 1987.7, found: 1987.3 ; calcd. for  $\text{C}_{411}\text{H}_{659}\text{N}_{111}\text{O}_{174}$   $[\text{M}+6\text{H}]^{6+}$ : 1656.5, found: 1656.2 ; Analytical RP-HPLC:  $t_{\text{R}}$  = 8.78 min. (0-40% solv.B in 15 min.).

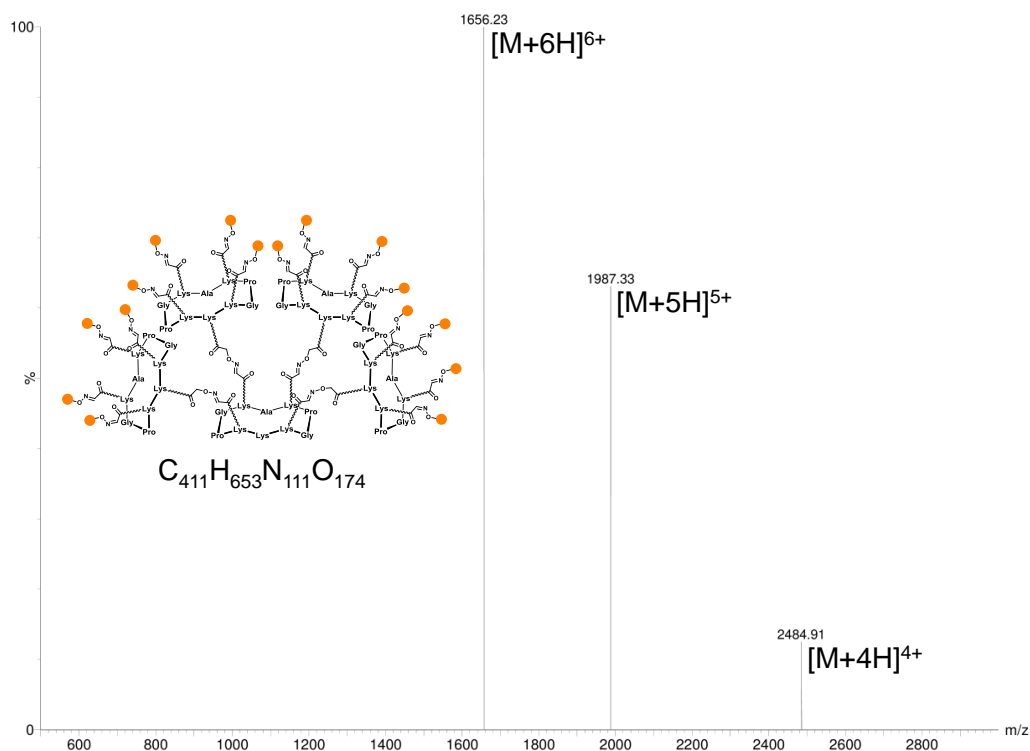

**Figure S59.** ESI<sup>+</sup>-MS spectrum of **30**.  $m/z$  (Average Mwt) calcd. for  $\text{C}_{411}\text{H}_{657}\text{N}_{111}\text{O}_{174}$   $[\text{M}+4\text{H}]^{4+}$ : 2484.3, found: 2484.9 ; calcd. for  $\text{C}_{411}\text{H}_{658}\text{N}_{111}\text{O}_{174}$   $[\text{M}+5\text{H}]^{5+}$ : 1987.7, found: 1987.3 ; calcd. for  $\text{C}_{411}\text{H}_{659}\text{N}_{111}\text{O}_{174}$   $[\text{M}+6\text{H}]^{6+}$ : 1656.5, found: 1656.2



$^1\text{H-NMR}$  of **30** in  $\text{D}_2\text{O}$  at 400 MHz

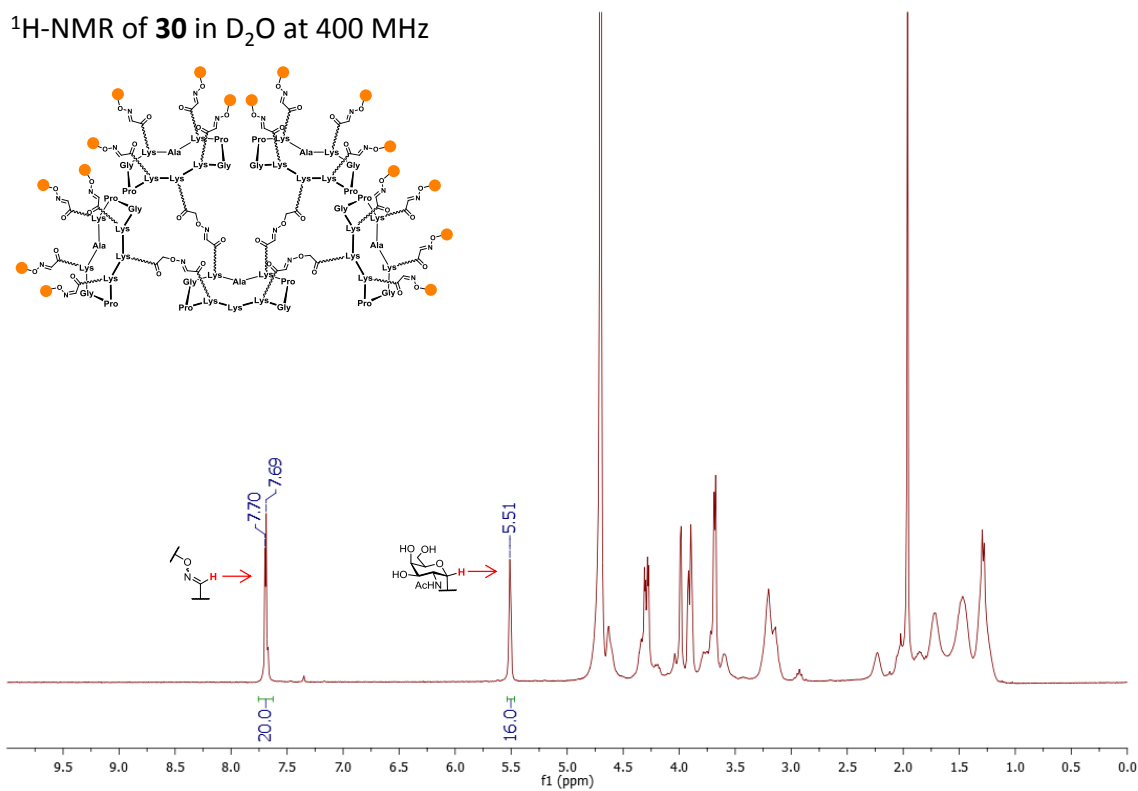

**Figure S60.**  $^1\text{H-NMR}$  spectrum of compound **30** ( $\text{D}_2\text{O}$ , 400 MHz) showing integration of characteristic signals.

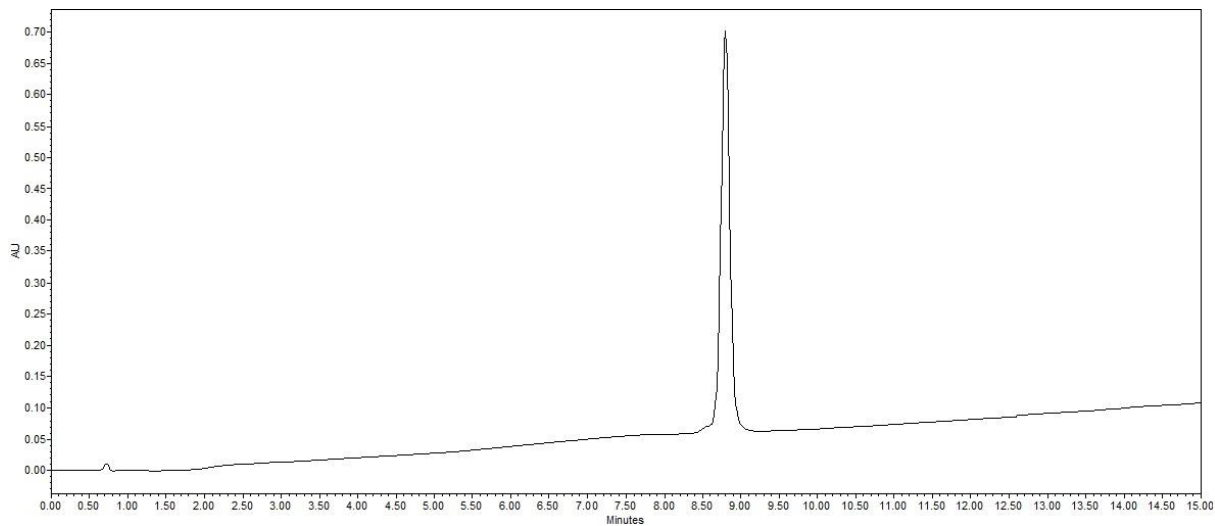

**Figure S61.** RP-HPLC profile of **30**:  $t_R = 8.78$  min. (0-40% solv.B in 15 min.).

## Compound 31.

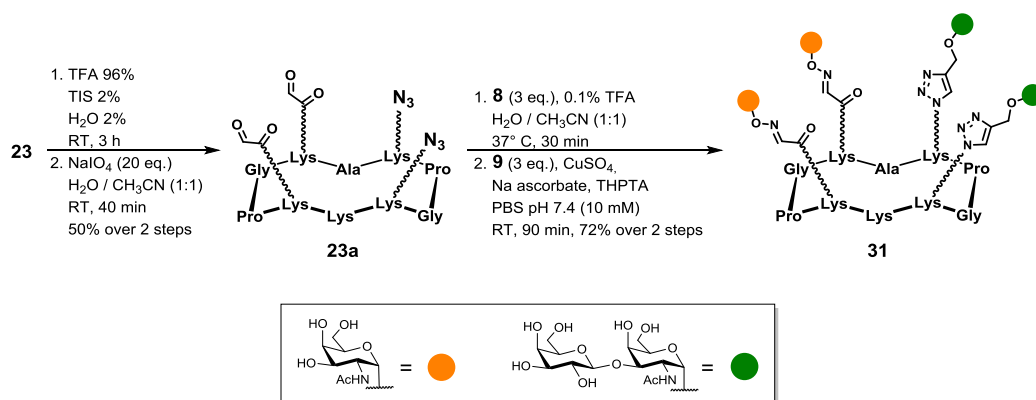

**Scheme S2.** Synthesis of compound **31**.

### Synthesis of compound **23a**.

A solution containing trifluoroacetic acid (TFA), triisopropylsilane (TIS) and water (1.0 mL, 96:2:2) was added to **23** (6.8 mg, 4.4 μmol). After 3 hours stirring at room temperature the reaction mixture was added to ice-cold Et<sub>2</sub>O (10 mL) and the resulting precipitate was filtrated and dried to give a powder which was solubilized in H<sub>2</sub>O (1.0 mL). To this solution, sodium periodate (18.8 mg, 87.9 μmol) was added and the reaction mixture stirred at room temperature for 40 minutes. Direct RP-HPLC purification, followed by lyophilization afforded compound **23a** (2.6 mg) in 50% yield over two steps. HRMS (ESI<sup>+</sup>-TOF) *m/z* (Monoisotopic Mwt) calcd. for C<sub>51</sub>H<sub>82</sub>N<sub>19</sub>O<sub>14</sub> [M+H]<sup>+</sup>: 1184.6289, found: 1184.6309; calcd. for C<sub>101</sub>H<sub>86</sub>N<sub>19</sub>O<sub>16</sub>Na [M+H<sub>2</sub>O+H]<sup>+</sup>: 1220.6500, found: 1220.6527; Analytical RP-HPLC: *t<sub>R</sub>* = 3.78 min. (5-100% solv.B in 15 min.).

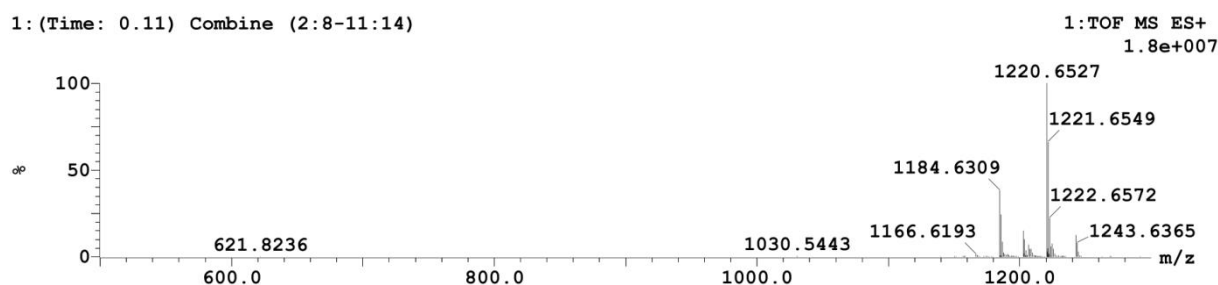

**Figure S62.** HRMS (ESI<sup>+</sup>-TOF) of **23a**: *m/z* (Monoisotopic Mwt) calcd. for C<sub>51</sub>H<sub>82</sub>N<sub>19</sub>O<sub>14</sub> [M+H]<sup>+</sup>: 1184.6289, found: 1184.6309; calcd. for C<sub>101</sub>H<sub>86</sub>N<sub>19</sub>O<sub>16</sub>Na [M+H<sub>2</sub>O+H]<sup>+</sup>: 1220.6500, found: 1220.6527

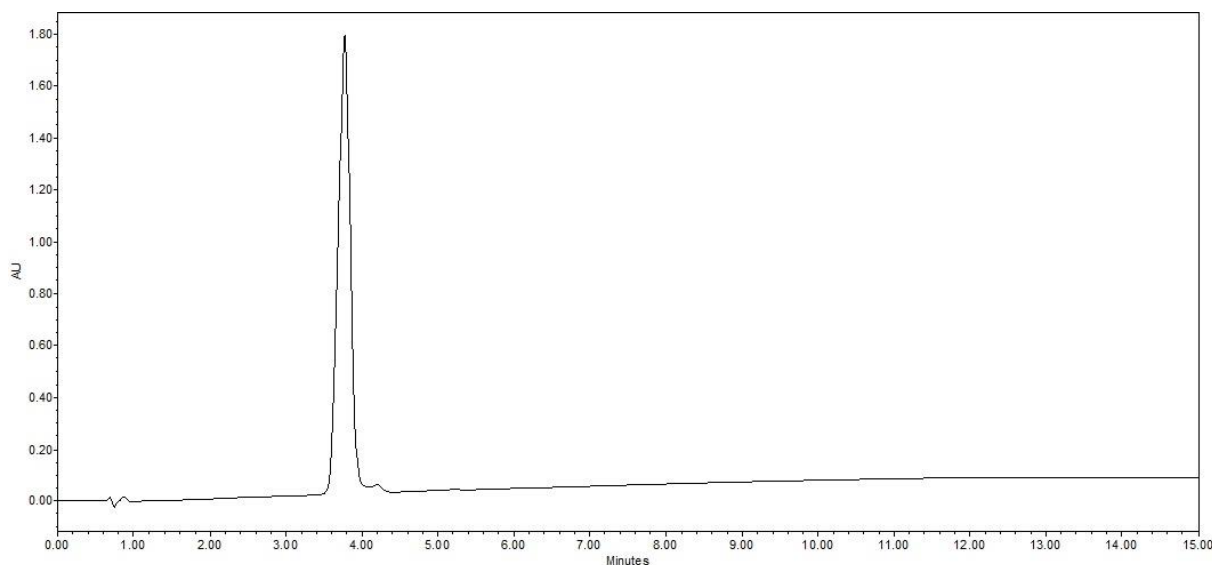

**Figure S63.** RP-HPLC profile of **23a**:  $t_R = 3.78$  min. (5-100% solv.B in 15 min.).

#### Synthesis of compound **31**.

To a solution of **23a** (2.2 mg, 1.9  $\mu\text{mol}$ ) in a  $\text{H}_2\text{O}/\text{CH}_3\text{CN}$  (1:1, 0.5 mL) mixture containing 0.09%  $\text{CF}_3\text{CO}_2\text{H}$ , **8** (1.4 mg, 5.9  $\mu\text{mol}$ ) was added and the reaction heated at  $37^\circ\text{C}$  without stirring. After 30 minutes, **9** (2.4 mg, 5.7  $\mu\text{mol}$ ) was added to this mixture, then 1.0 mL of PBS buffer (pH 7.4, 10mM) was added and the solution degassed by argon bubbling for 15 minutes. A separate solution, containing  $\text{CuSO}_4$  (0.2 mg, 0.8  $\mu\text{mol}$ ), THPTA (1.7 mg, 3.9  $\mu\text{mol}$ ) and sodium ascorbate (1.5 mg, 7.6  $\mu\text{mol}$ ) in previously degassed PBS buffer (1.0 mL, pH 7.4, 10mM) was added to the reaction mixture. After 90 minutes stirring at room temperature, Chelex<sup>®</sup> resin was added to the reaction mixture and stirred for 30 minutes at room temperature in order to remove residues of copper. The crude was then purified by preparative RP-HPLC and lyophilized to afford 3.4 mg of pure **31** (72% yield over two steps). HRMS (ESI<sup>+</sup>-TOF)  $m/z$  (Monoisotopic Mwt) calcd. for  $\text{C}_{101}\text{H}_{164}\text{N}_{25}\text{O}_{46}$   $[\text{M}+\text{H}]^+$ : 2463.1262, found: 2463.1223 ; calcd. for  $\text{C}_{101}\text{H}_{163}\text{N}_{25}\text{O}_{46}\text{Na}$   $[\text{M}+\text{Na}]^+$ : 2485.1081, found: 2485.1047 ; Analytical RP-HPLC:  $t_R = 5.40$  min. (0-40% solv.B in 15 min.).

R2(TRZ)TF2(Ox)Tn\_4 (0.104) Cm (4:7)

1: TOF MS ES+  
8.19e+003

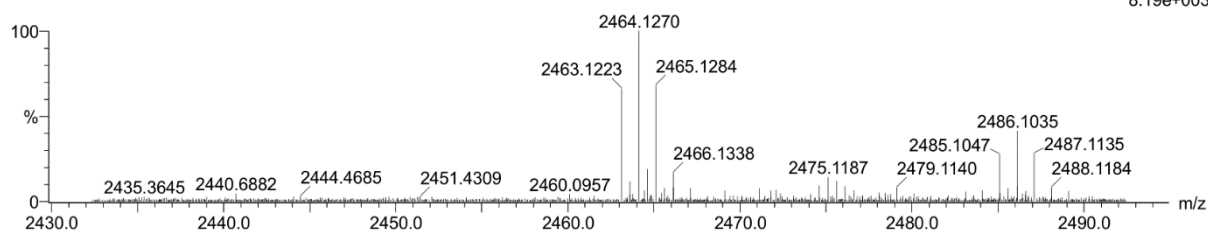

**Figure S64.** HRMS (ESI<sup>+</sup>-TOF) of **31**:  $m/z$  (Monoisotopic Mwt) calcd. for  $\text{C}_{101}\text{H}_{164}\text{N}_{25}\text{O}_{46}$   $[\text{M}+\text{H}]^+$ : 2463.1262, found: 2463.1223 ; calcd. for  $\text{C}_{101}\text{H}_{163}\text{N}_{25}\text{O}_{46}\text{Na}$   $[\text{M}+\text{Na}]^+$ : 2485.1081, found: 2485.1047

$^1\text{H-NMR}$  of **31** in  $\text{D}_2\text{O}$  at 400 MHz

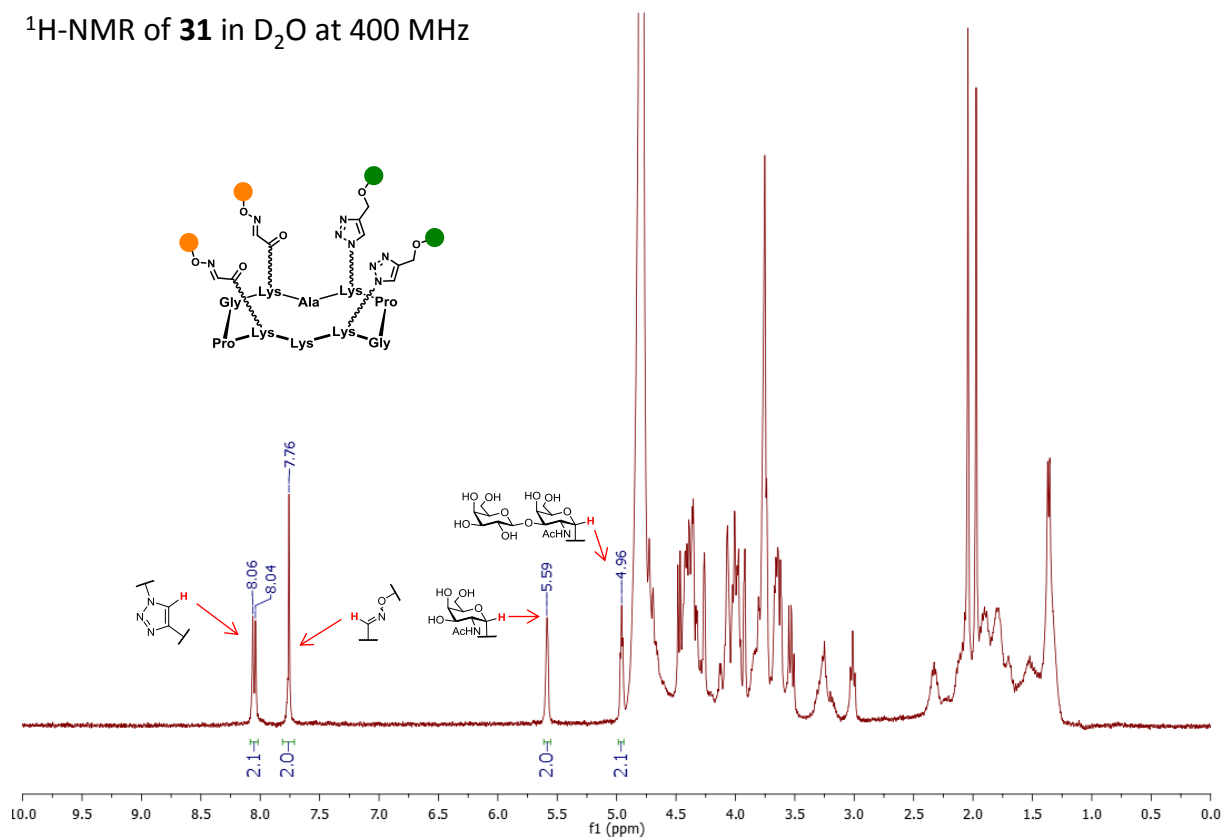

**Figure S65.**  $^1\text{H-NMR}$  spectrum of compound **31** ( $\text{D}_2\text{O}$ , 400 MHz) showing integration of characteristic signals.

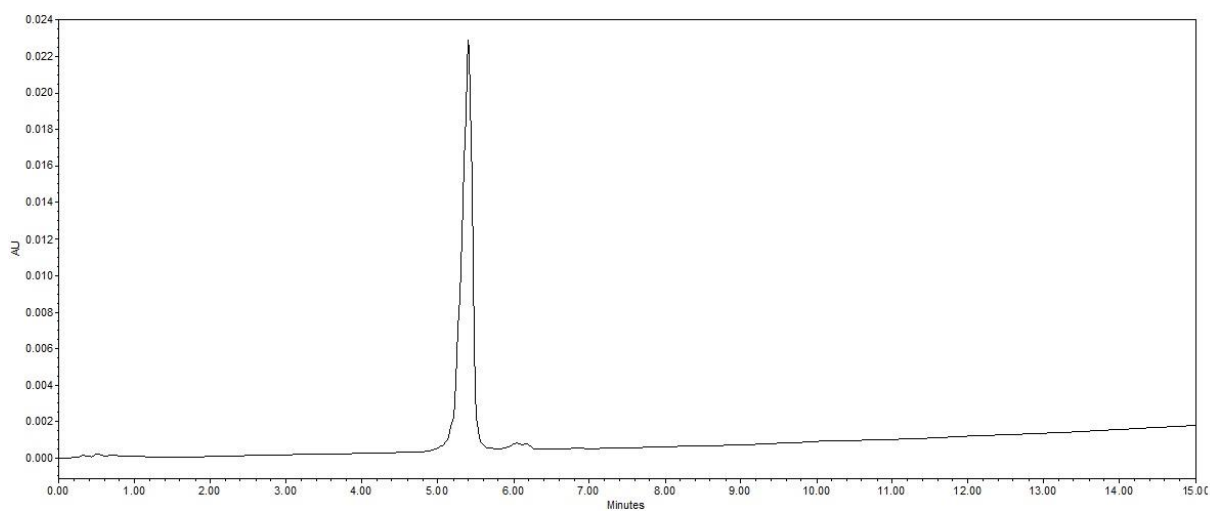

**Figure S66.** RP-HPLC profile of **31**:  $t_R = 5.40$  min. (0-40% solv.B in 15 min.).

## Compound 32.

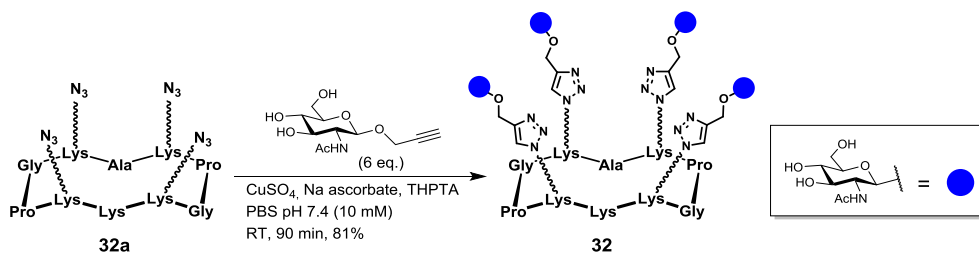

**Scheme S3.** Synthesis of compound **32**.

### Synthesis of compound **32**.

To a solution of **32a** (5.4 mg, 4.8  $\mu\text{mol}$ ) in DMF (0.6 mL), prop-2-ynyl 2-acetamido-2-deoxy-  $\beta$ -D-glucopyranoside<sup>2</sup> (7.5 mg, 28.9  $\mu\text{mol}$ ) was added and the mixture degassed by argon bubbling for 15 minutes. A separate solution, containing  $\text{CuSO}_4$  (0.2 mg, 0.8  $\mu\text{mol}$ ), THPTA (8.3 mg, 19.1  $\mu\text{mol}$ ) and sodium ascorbate (7.6 mg, 38.4  $\mu\text{mol}$ ) in previously degassed PBS buffer (1.2 mL, pH 7.4, 10mM) was added to the reaction mixture. After 90 minutes stirring at room temperature, Chelex<sup>®</sup> resin was added to the reaction mixture and stirred for 30 minutes at room temperature in order to remove residues of copper. The crude was then purified by preparative RP-HPLC and lyophilized to afford pure **32** (8.4 mg) in 81% yield. HRMS (ESI<sup>+</sup>-TOF)  $m/z$  (Monoisotopic Mwt) calcd. for  $\text{C}_{91}\text{H}_{146}\text{N}_{27}\text{O}_{34}$   $[\text{M}+\text{H}]^+$ : 2161.0526, found: 2161.0530 ; calcd. for  $\text{C}_{91}\text{H}_{145}\text{N}_{27}\text{O}_{34}\text{Na}$   $[\text{M}+\text{Na}]^+$ : 2184.0373, found: 2184.0386 ; Analytical RP-HPLC:  $t_{\text{R}}$  = 5.48 min. (0-40% solv.B in 15 min.).

1: (Time: 0.13) Combine (5:7-9:12)

1:TOF MS ES+  
1.1e+04

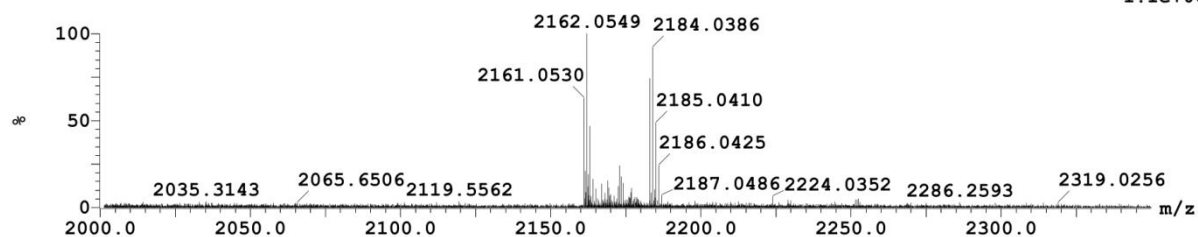

**Figure S67.** HRMS (ESI<sup>+</sup>-TOF) of **32**:  $m/z$  (Monoisotopic Mwt) calcd. for  $\text{C}_{91}\text{H}_{146}\text{N}_{27}\text{O}_{34}$   $[\text{M}+\text{H}]^+$ : 2161.0526, found: 2161.0530 ; calcd. for  $\text{C}_{91}\text{H}_{145}\text{N}_{27}\text{O}_{34}\text{Na}$   $[\text{M}+\text{Na}]^+$ : 2184.0373, found: 2184.0386

$^1\text{H-NMR}$  of **32** in  $\text{D}_2\text{O}$  at 400 MHz

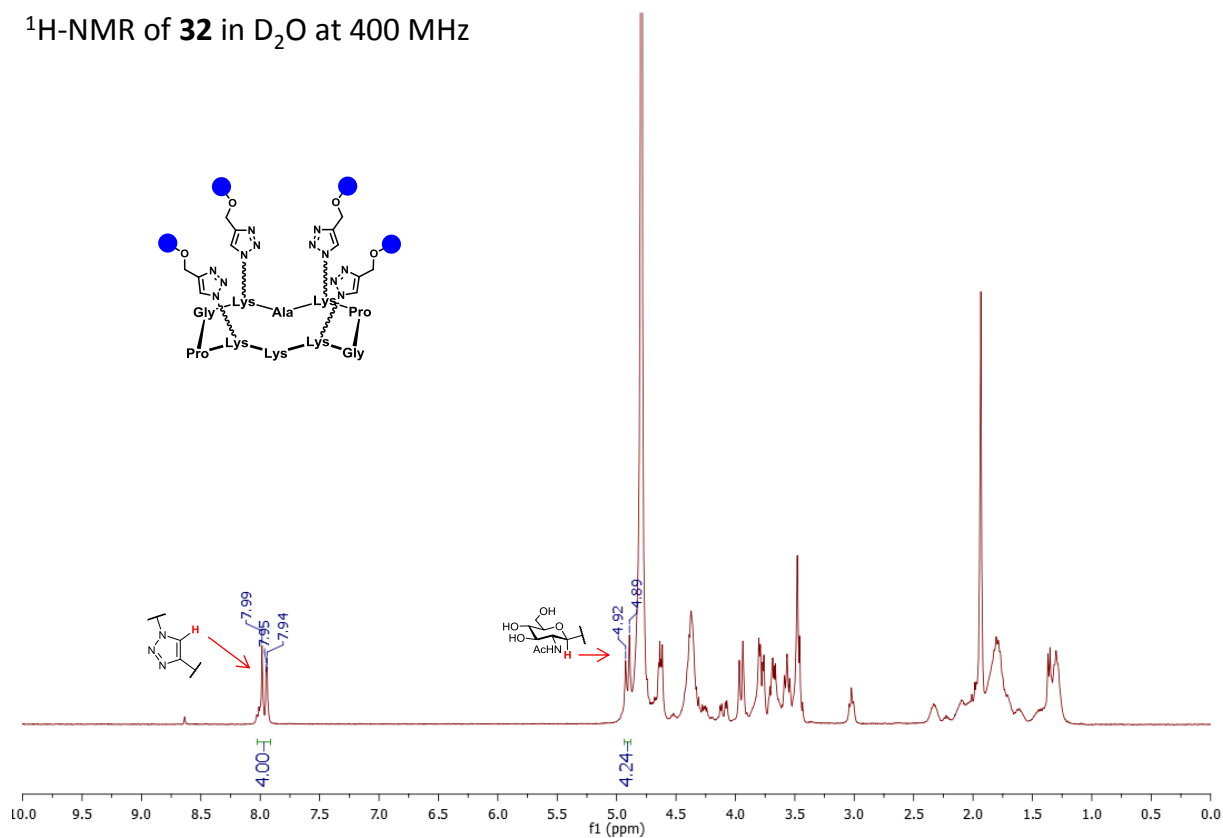

**Figure S68.**  $^1\text{H-NMR}$  spectrum of compound **32** ( $\text{D}_2\text{O}$ , 400 MHz) showing integration of characteristic signals.

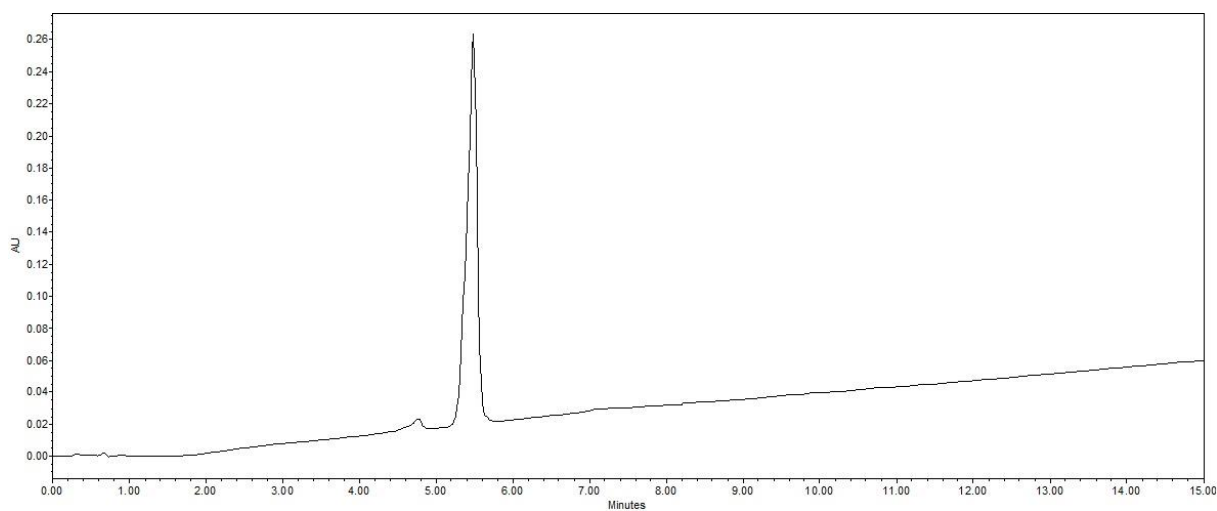

**Figure S69.** RP-HPLC profile of **32**:  $t_R = 5.48$  min. (0-40% solv.B in 15 min.).

## Compound 33.

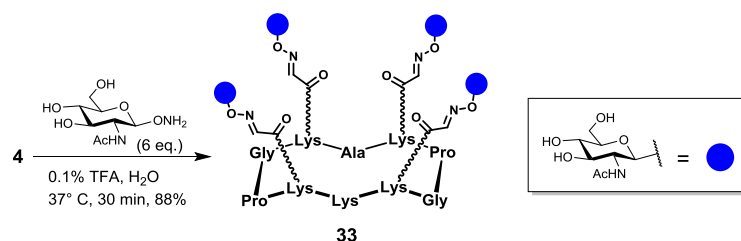

**Scheme S4.** Synthesis of compound **33**.

### Synthesis of compound 33.

To a solution of **4**<sup>3</sup> (4.9 mg, 3.9  $\mu\text{mol}$ ) in  $\text{H}_2\text{O}$  (1.0 mL) containing 0.09%  $\text{CF}_3\text{CO}_2\text{H}$ , 2-acetamido-2-deoxy- $\beta$ -D-glucopyranosyl hydroxylamine<sup>2</sup> (5.5 mg, 23.3  $\mu\text{mol}$ ) was added and the reaction heated at 37°C without stirring. After 30 minutes the reaction mixture was directly purified by preparative RP-HPLC and lyophilized to afford pure **33** (7.3 mg) in 88% yield. HRMS (ESI<sup>+</sup>-TOF)  $m/z$  (Monoisotopic Mwt) calcd. for  $\text{C}_{87}\text{H}_{142}\text{N}_{23}\text{O}_{38}$  [M+H]<sup>+</sup>: 2116.9886, found: 2116.9878 ; calcd. for  $\text{C}_{87}\text{H}_{141}\text{N}_{23}\text{O}_{38}\text{Na}$  [M +Na]<sup>+</sup>: 2138.9706, found: 2138.9624 ; Analytical RP-HPLC:  $t_R$  = 5.39 min. (0-40% solv.B in 15 min.).

R4(Ox)GlcNAc 4 (0.104) Cm (4:6)

1: TOF MS ES+  
4.56e+002

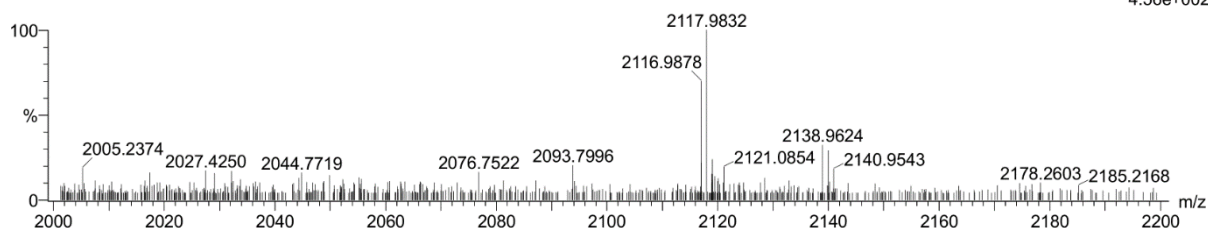

**Figure S70.** HRMS (ESI<sup>+</sup>-TOF) of **33**:  $m/z$  (Monoisotopic Mwt) calcd. for  $\text{C}_{87}\text{H}_{142}\text{N}_{23}\text{O}_{38}$  [M+H]<sup>+</sup>: 2116.9886, found: 2116.9878 ; calcd. for  $\text{C}_{87}\text{H}_{141}\text{N}_{23}\text{O}_{38}\text{Na}$  [M +Na]<sup>+</sup>: 2138.9706, found: 2138.9624

$^1\text{H-NMR}$  of **33** in  $\text{D}_2\text{O}$  at 400 MHz

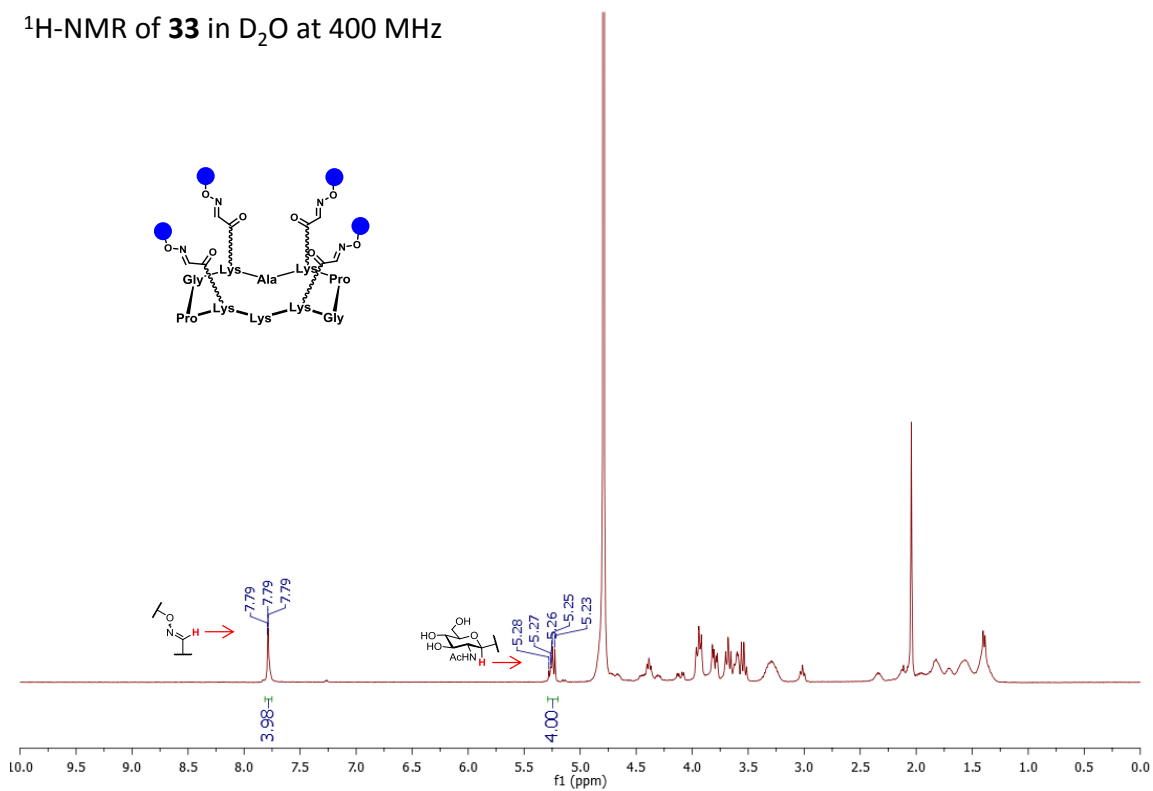

**Figure S71.**  $^1\text{H-NMR}$  spectrum of compound **32** ( $\text{D}_2\text{O}$ , 400 MHz) showing integration of characteristic signals.

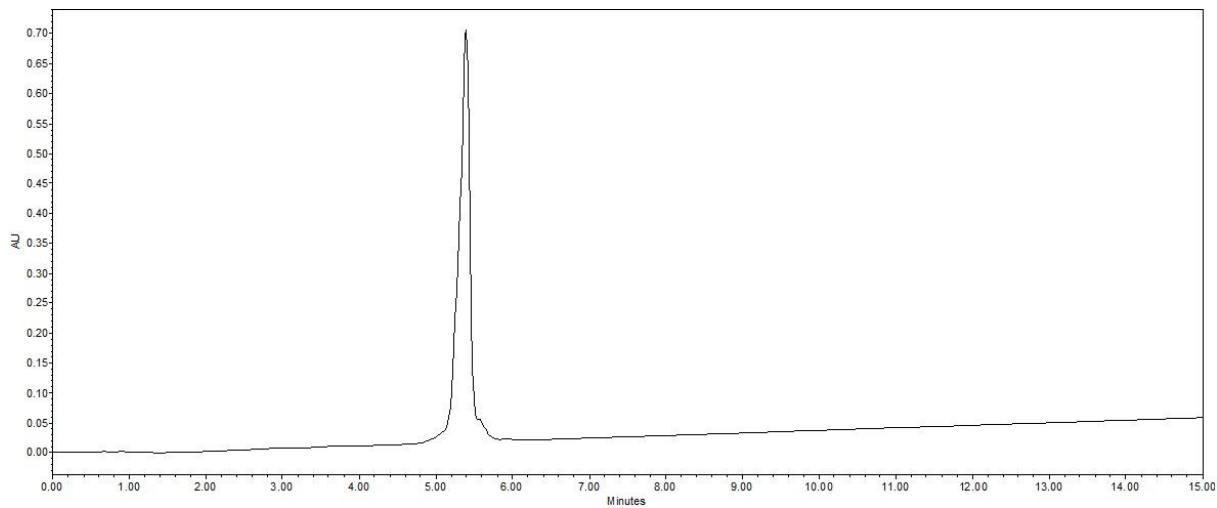

**Figure S72.** RP-HPLC profile of **33**:  $t_R = 5.39$  min. (0-40% solv.B in 15 min.).



## References

- [1] B. Thomas, N. Berthet, J. Garcia, P. Dumy, O. Renaudet, *Chem. Commun.* **2013**, 49, 10796-10798.
- [2] M. Fiore, N. Berthet, A. Marra, E. Gillon, P. Dumy, A. Dondoni, A. Imberty, O. Renaudet, *Org. Biomol. Chem.* **2013**, 11, 7113-7122.
- [3] Y. Singh, O. Renaudet, E. Defrancq, P. Dumy, *Org. Lett.* **2005**, 7, 1359-1362.
